# Supplementary material
Source: publisher figshare collection journal article supplement (https://acs.figshare.com/ndownloader/files/3984973)
Supplement: Supplementary file 1 [file 3984973]

## Sheet: Sheet2
Table S6. N-glycopeptides identified from OCT-embeded tissues by GenoGlyco method
Massa	Matched.peptide by GenoGlycob	Lys Count	Arg Count	H/L ratioc	Varified by MS/MSd	Matched.protein by GenoGlyco
1536.71	MATGAnATPLDFPSK;InHSSDQGISSYTK	1		1.8046		IPI00294627.3;IPI00386114.1;IPI00386117.3;IPI00386120.3;IPI00941553.2;IPI00784002.3;IPI00795015.2
2940.29	GFQDVEAQAATCnHTVMALMASLDAEK	1		0.37006	GFQDVEAQAATcnHTVmALmASLDAEK	IPI00026241.1
1150.59	YnLSEVLQGK;FnSSDLGVAIK	1		4.9625	YnLSEVLQGK	IPI00024572.3;IPI00925578.1
1386.64	AVDEDPEnQTLR		1	2.0412		IPI00647465.2
1703.79	AInQTAVECTWTGPR		1	0.46981		IPI00022608.2
2865.16	GYYnQSEAGSHTLQSMYGCDVGPDGR		1	2.535		IPI00004657.1
1169.53	LnSSNSASPHR		1	6.628		IPI00221325.3
2388.16	NLPFLEHLELIGSnFSSAMPR;AQQLLAnSTALEEAMLQEQQR		1	3.1889	AQQLLAnSTALEEAmLQEQQR	IPI00329057.8;IPI00336170.5;IPI00386731.3;IPI00783665.5
1818.98	FQVnNTRPPHVQLLR		2	1.2049	FQVnnTRPPHVQLLR	IPI00018879.2
1799.9	QQAnESLESLIPDSLR;AnTSALAVPSPVSNSASAR		1	3.6369	AnTSALAVPSPVSNSASAR	IPI00009727.1;IPI00296922.4
2093.99	NPVGLIGAEnATGETDPSHSK	1		0.60948	NPVGLIGAEnATGETDPSHSK	IPI00218413.2
652.319	InYSR;nLSYR;LnYSR;VnYTR		1	1.1644		IPI00004409.2;IPI00021076.1;IPI00026952.2;IPI00334400.2;IPI00023126.2;IPI00306871.4
1663.84	LCQALAInKSFDQR;GELnTSIFSSRPIDK;AGnQTGLYVLRCSPK	1	1	2.038	GELnTSIFSSRPIDK	IPI00218495.3;IPI00295497.2;IPI00384280.5;IPI00031016.1
2760.43	LASPPSQGEVPPGPLPEAVLALYnSTR		1	0.90647		IPI00000075.3
2603.29	CQGSAQKLLQNVnDTLSRSWAVK;NYVHFAATQVQNRIKEVnETNK;InTTADEKDPTNPFRFPNIGVEK;AFIQSSnLTEHMRIHTGEKPYK	2	1	1.8361	InTTADEKDPTNPFRFPNIGVEK	IPI00007365.1;IPI00010252.4;IPI00221114.2;IPI00013897.1;IPI00168690.6
2142.12	SLTQGSLIVGDLAPVnGTSQGK	1		0.50449	SLTQGSLIVGDLAPVnGTSQGK	IPI00024284.6
1704.89	RPnQSQPLPPSSLQR		2	1.3933		IPI00021983.1;IPI00375688.1
1924.91	IHVAGETDSSNLnVSEPR		1	1.3811	IHVAGETDSSnLnVSEPR	IPI00290328.3
1956.99	VSPQDANPLMAnGTLTRR		2	0.57862		IPI00182469.4;IPI00182540.7;IPI00219869.1;IPI00219870.1;IPI00219872.1;IPI00219873.1;IPI00845519.1;IPI00942869.1
1266.57	EVFGDTLnESR;nSSSSTIGSPSSR		1	1.4484		IPI00060715.1;IPI00783859.2;IPI00924608.1
1316.68	VSLGLDEnVSKR;KLnYTLSQGHR;AFRnSSGLTVHK;AFRVSSnLTGHK	1	1	3.5982	KLnYTLSQGHR	IPI00021770.1;IPI00221382.3;IPI00221224.6;IPI00410359.4;IPI00955961.1;IPI00014133.8
1317.6	QAQEHYnATQK;SPSGPSGSLEnGTK	1		1.4002		IPI00030272.4;IPI00816822.1;IPI00073096.3;IPI00232492.4
1194.54	FDVLDEnQSK	1		3.0672		IPI00395631.3;IPI00470778.1
3195.6	MLQNSAVLLVLVISASATHEAEQnDSVSPR;VFDLQQNLGSVnVSTGCAPALQAQTPGLGPR		1	1.0159		IPI00005564.1;IPI00783665.5
1636.79	ELnSTYSEQDPLLK	1		2.1894		IPI00004970.5
1366.62	FRPMDnLSGGEK;GDKnVTMGQSSAR	1	1	0.46881		IPI00291939.1;IPI00299412.7;IPI00397229.4;IPI00397230.2
800.476	LInATLR		1	0.79062		IPI00102580.1
1757.88	LLHALGGDDFLGMLnR;AIVLCHnVTPVYESR		1	0.82339		IPI00384280.5;IPI00396022.2;IPI00479667.5
1300.7	LNAInITSALDR		1	1.0649		IPI00418183.4
1777.81	SYSTTYEERnITGTR;SInCSELNVRESDVR		2	10.2	SYSTTYEERnITGTR	IPI00019472.4;IPI00293588.4
2902.35	VAAAnVSVTQPESTGDPNnMTLLAEEAR		1	0.91592		IPI00298281.4
2895.43	ESLDTAAVVQVGISRnQSHSSPSVSPSR		2	1		IPI00337315.1;IPI00376283.1;IPI00744671.1
1565.76	YEQAKnISQDLEK	2		0.55587	YEQAKnISQDLEK	IPI00298281.4
1768.78	ITDSEDKALMnGSESR	1	1	11.599	ITDSEDKALmnGSESR	IPI00019906.1;IPI00218019.1
2112.96	TPASDPHGDnLTYSVFYTK	1		1.3858		IPI00023814.2;IPI00217291.2
3030.44	VAAAnVSVTQPESTGDPNnMTLLAEEARK	1	1	1.5207		IPI00298281.4
1218.62	VnNTLSSQISR;nDTLSEAISIR		1	1.1697	VnnTLSSQISR	IPI00298281.4;IPI00011644.4;IPI00334825.1;IPI00954465.1
1131.52	nCTNSPAIVR;LPEnWTDTR;AFSYnSSLSR;QEQIDnQTR		1	1.8744		IPI00017327.5;IPI00004758.5;IPI00394833.4;IPI00844215.1;IPI00871535.1
2984.48	ANNIHSSPSFTHLDKSSPQKFLSnLSK	3		0.77581		IPI00002374.3
3539.79	IQNILSEKPTVTTVYANnGSVLQGSSVASVYDGK	2		1.0905		IPI00290945.2;IPI00742670.2
964.469	nATVVWMK	1		3.1445		IPI00015102.2;IPI00807403.1
1735.85	DnLSYIEHIFEISR;ASFETLPnISDLCLR		1	1.576		IPI00014850.4;IPI00071826.3;IPI00470480.3;IPI00645882.1
1711.81	GDPSVISVnGTDFTFR;ADGPnNTGNPEFPILR		1	1.0821		IPI00170706.2;IPI01011640.1;IPI00302693.6
1712.77	nMSFVNDLTVTQDGR		1	0.57545	nmSFVNDLTVTQDGR	IPI00031131.4;IPI00929530.1
986.576	LSGnLTLLR		1	1.9664		IPI00552671.3
1803.8	QESSSSVnTSNKMNFK	2		1.2313		IPI00006714.3;IPI00030246.1;IPI00337648.3;IPI00472958.3
702.391	VQnITK;QnLTVK;GnGTILK;NInITK;nQSILK;InLSQK;LAnISGK	1		1.3242		IPI00015473.3;IPI00023283.3;IPI00179357.2;IPI00375498.3;IPI00759542.1;IPI00759613.4;IPI00759637.1;IPI00759754.1;IPI00939967.1;IPI00157556.1;IPI00940626.4;IPI00215637.5;IPI00216533.4;IPI00216534.2;IPI00471944.3;IPI00550044.2;IPI00295851.4;IPI00456578.4
762.413	SLTnLSK;LnSSTIK;SLnISTK;nLSISTK;SnLTSLK	1		2.8275		IPI00007219.1;IPI00009030.1;IPI00739827.1;IPI00010654.1;IPI00187080.1;IPI00027086.5;IPI00872685.3;IPI00554739.1;IPI00556642.1
934.487	FVLQnASR		1	0.28693		IPI00015101.2
1600.71	AFnSTLPTMAQMEK	1		1.3945	AFnSTLPTmAQmEK	IPI00297160.4;IPI00305064.2;IPI00418465.5;IPI00419219.4;IPI00827555.2;IPI00827650.2;IPI00827795.2;IPI00827893.1;IPI00827937.2;IPI00827982.2;IPI00828056.2;IPI00828064.2;IPI00828108.1;IPI00828192.2;IPI00956122.2;IPI00984539.2
1930.91	nITIIVEDPIAESCNDK	1		2.0026		IPI00924876.1
1293.6	LQNnCTSSITR;VSnVSCQASVSR		1	2.3679	VSnVScQASVSR	IPI00470533.2;IPI00871302.1;IPI01010596.1
859.476	GVSLnLTR		1	0.68613		IPI00000352.1;IPI00014344.1;IPI00182717.8;IPI00215873.1;IPI00219250.1;IPI00219251.1;IPI00219252.1;IPI00332215.1
843.47	TVnVSVPK	1		1.072		IPI00151358.2;IPI00186429.8
2313.18	SVRSTLQPMPnGTPVNLLGTSK	1	1	1.9807		IPI00146077.4;IPI00166997.2;IPI00423392.5
2051.93	VnASTTEPnSTVEQSALMR		1	0.45703	VnASTTEPnSTVEQSALmR	IPI00013976.4
2005.97	GCEVTPDVnISGQKFNIK;VIInDTEDEPTLEFDKK;DADLSPVnASIIKENYEK;nNTTFLECAPKSPQASIK	2		0.59694		IPI00000856.7;IPI00383500.3;IPI00455316.3;IPI00943593.2;IPI00552988.5;IPI00553004.3;IPI00973514.1;IPI01014918.1
1718.81	InTTADEKDPTNPFR	1	1	1.488	InTTADEKDPTNPFR	IPI00013897.1
1586.8	QESQLRKPEnTTR;nMTLQRTMKLYR;RVNDnKTAAEEALR	1	2	0.54093	RVnDnKTAAEEALR	IPI00015801.3;IPI00030223.3;IPI00298281.4
1282.69	AEFnITLIHPK	1		1.5854	AEFnITLIHPK	IPI00221224.6
1774.8	GLQNPFPQQMQnNSR;WQSVFnDSQEHLER;YnCTVVQYIGEICR		1	54.576		IPI00141933.3;IPI00921844.1;IPI00922915.1;IPI00384981.4;IPI00442344.4
1270.56	SLCSLNMnSTK	1		0.95738		IPI00028438.4;IPI00413562.2;IPI00641967.2
1535.62	EnSSSQDPQTEGTR		1	1.1576		IPI00219425.3;IPI00219426.1;IPI00299158.1
1115.53	IAnFTEHQR		1	1.6608		IPI00412544.2;IPI00930252.1
871.502	VPTISInK	1		1.8819		IPI00008274.8;IPI00027342.1;IPI00639931.3
1542.64	YFFnLSSMTCEK	1		5.2099	YFFnLSSmTcEK	IPI00009198.3
1210.58	AFNKCSnLTR	1	1	1.2826		IPI00167901.3
1561.84	KnLTLMATTSQLPK	2		0.17404		IPI00003807.7
2342.04	SALLEFACTHNLGnCSTTAMK;LnSSVLVPYGAESSEDSDEESK	1		2.7028		IPI00221240.3;IPI00221241.3;IPI00307017.2;IPI00784612.3;IPI01009873.1
2968.49	FLKPYTLEEQKnLTVCPDGALFEQK	3		0.98046	FLKPYTLEEQKnLTVcPDGALFEQK	IPI00008167.1
1974.93	DSNnNSILHMWHLHLK	1		1.6909		IPI00152542.4
1139.5	GEnFTETDVK;nYTENELEK;nTSWDNAGFK;DYnLTEEQK	1		0.61104		IPI00022284.3;IPI00956325.1;IPI00027146.1;IPI00029606.1;IPI00288894.1;IPI00217375.3;IPI00640902.1
980.424	ALMnGSESR;ESLMnQSR		1	4.7144		IPI00019906.1;IPI00218019.1;IPI00171117.5
1841.93	HEnITTAATEIIGAICK;TVAQnYSSVTHLHSIGK	1		0.71566	TVAQnYSSVTHLHSIGK	IPI00004970.5;IPI00026270.1
1264.59	NTELSQnFSPK;YESQQnGTPLK	1		3.3471		IPI00031589.4;IPI00844323.2
2464.15	GPSTPLPEDPNWnVTEFHTTPK;LGNLMSLDISGHMILEnCSISK	1		1.8121	GPSTPLPEDPNWnVTEFHTTPK	IPI00221224.6;IPI00376483.3
1431.69	IHQnITYQVCR		1	0.070803	IHQnITYQVcR	IPI00028908.4;IPI00955436.1
1094.56	SFSQnGTLIK	1		1.1627		IPI01010233.1
1113.53	SAEGTFFInK	1		1.4128	SAEGTFFInK	IPI00027851.2
1729.94	RGVFITnETGQPLIGK;VFRPNGIALTWnITK	1	1	0.29458	RGVFITnETGQPLIGK	IPI00293088.7;IPI00411827.4
2093.94	STCPSAAPSASAPAMTTVEnK;EGFSAnYSVLQSSVSEDFK;NnESESTLDLEGFQNPTAK	1		0.45514	EGFSAnYSVLQSSVSEDFK	IPI00178072.8;IPI00299594.2;IPI00607733.3;IPI00336000.6;IPI00552923.1;IPI00604491.1
1467.77	IYnVTYLEPSLR		1	1.563		IPI00444383.1;IPI00444384.9
1820.83	DLEITnATLQSEEDSR		1	2.6905	DLEITnATLQSEEDSR	IPI00465261.2;IPI00747807.1;IPI00877711.1;IPI00878267.1
2030.98	YVQDQVAAPFQLSnHTGR		1	0.83463		IPI00784258.3;IPI00973177.1
1953.94	LSCSELSLYQPLQnSSK;LnGSAASHVLHQDSGLGYK;TGLTSGnVTENLQTYIDK	1		0.52933		IPI00006714.3;IPI00030246.1;IPI00337648.3;IPI00410700.4;IPI00640117.4;IPI00783299.2
5144.27	EnGTDTVQEEEESPAEGSKDEPGEQVELKEEAEAPVEDGSQPPPPEPK	3		0.58925		IPI00000877.1
1272.66	VVAnGTGTQGQLK;ALSPnSTISSAPK;TLSPTGnISSAPK	1		1.0623		IPI00027745.4;IPI00219516.2;IPI00295940.4;IPI00783943.2;IPI00873723.2
2516.15	YnATVYSQAAnGTEGQPQAIEFR		1	2.5374	YnATVYSQAAnGTEGQPQAIEFR	IPI00290328.3
2063.02	DRTNIQDnESTLEVTSLK;TLAGEnQTAFEIEELNRK;DALnVSQAWRWSLPYEK	1	1	0.97822	TLAGEnQTAFEIEELNRK	IPI00012500.1;IPI00514398.1;IPI00298281.4;IPI00301494.2
947.457	SELVnETR;HLnSSHPR		1	0.9456	SELVnETR	IPI00021302.3;IPI00936738.1
1504.78	EAVFAVNALnISEK	1		1.2959		IPI00023807.3;IPI00915390.1
1458.76	NSnLTELGLQEIK	1		0.91752		IPI00337726.2;IPI00384449.2;IPI00647901.4;IPI00895784.1;IPI00895932.1
2222.17	YTLnITVYDLGIPQKAAWR	1	1	0.5955		IPI00940698.4
1477.78	LnWTSLLPASFTK;DWLLNYnLTVVK;IVTLTPFCTIAnK	1		1.9109	LnWTSLLPASFTK	IPI00002230.6;IPI00790972.2;IPI00924788.2;IPI00288958.7;IPI00790360.1;IPI00412216.2;IPI00465428.2;IPI00604778.1;IPI00797358.2
2854.4	DEIGnVSTSHLLILDDSVEMEIRPR;LWATDHYQPLRIFAGHLADVnCTR		2	0.94739	DEIGnVSTSHLLILDDSVEmEIRPR	IPI00025874.2;IPI00298925.2;IPI00298926.4
2189.11	NVGPnTTSTVISTDAFRPGVR;DGQAQTLQnHSGLSAPVPRGR;LLSnSSSLWRSSGAPETLQR		2	0.99398		IPI00022674.2;IPI00220289.8;IPI00395823.4;IPI00604527.2
1266.55	TYnGTNPDAASR		1	1.194	TYnGTNPDAASR	IPI00030941.5
1710.76	LVVECVMNnVTCTR;GFFDPNTHEnLTYR		1	1.8089		IPI00007797.3;IPI00014898.3;IPI00186711.4;IPI00398002.6;IPI00398775.3;IPI00398776.3;IPI00398777.3;IPI00398778.3;IPI00398779.5;IPI00420096.4
1752.87	FVGTPEVnQTTLYQR;SSDQLYELLnISQSR		1	1.0971	FVGTPEVnQTTLYQR	IPI00032292.1;IPI00179337.6;IPI00787141.2;IPI00787434.2
1318.64	IDSTGnVTNELR;LPSQTESVTSnR		1	1.0972	IDSTGnVTNELR	IPI00027235.1;IPI00162735.3;IPI00939169.1;IPI00916402.1
2610.26	QLFIGGEACLWGEYVDATnLTPR;IETVLPAEFFEVLSSSQnGSYHR		1	0.65741	IETVLPAEFFEVLSSSQnGSYHR	IPI00012585.1;IPI00291755.6;IPI00871723.1
2902.35	VAAAnVSVTQPESTGDPNnMTLLAEEAR;ALnTTDSSSSPSLADGIDTSGGGSIHVISR		1	0.95347		IPI00298281.4;IPI00332451.3;IPI00749258.1
1426.69	LFIVESnSSSSTR;nTSWGVVQEPPGR;LLnCTAPGPDAAAR		1	1.7452		IPI00010090.1;IPI00015529.3;IPI00465259.4
1505.74	EnTSDPSLVIAFGR		1	2.1336	EnTSDPSLVIAFGR	IPI00884105.2
2698.15	DCSAAYDTLVELTVHMnETGHYR		1	0.53137		IPI00418941.6;IPI01008913.1
3114.49	VLGPYVDGLSQLAVTSFEDIESLMSEGnK;MnGTLTAVESFLTIHSGPEGLSIHDGTWK	1		0.78384		IPI00164861.3;IPI00218490.4;IPI00295487.5;IPI00807394.1;IPI00329600.3
1929.04	NLEKnSTKQEILAALEK	3		1.1205	nLEKnSTKQEILAALEK	IPI00012503.1;IPI00219825.2;IPI00744835.1
3515.65	DSGLPSQGLNFKFGDILHVInASDDEWWQAR	1	1	0.84572		IPI00030351.2;IPI00218729.4;IPI00552213.2;IPI00552376.2;IPI00552511.2;IPI00552682.2;IPI00553029.2
810.388	InSSAYR;GTnYTVR		1	0.79059		IPI00013909.1;IPI00759583.1;IPI00013976.4
2376.08	TEAGAFEYVPDPTFEnFTGGVK;AFQICAIMNLDnISYADCLK	1		0.91914	TEAGAFEYVPDPTFEnFTGGVK	IPI00853369.1;IPI00178767.1
2272.13	ENLELnGSILSGGYPGSAPLQR		1	0.0065119		IPI00022629.6;IPI00645623.2
2566.25	VVMDIPYELWnETSAEVADLKK	2		0.67604	VVmDIPYELWnETSAEVADLKK	IPI00551062.2
773.393	LNPTSnK;QPSnLSK	1		0.82835		IPI00003843.4;IPI00216245.4;IPI00216246.4;IPI00332453.2;IPI00797934.1;IPI00018906.6;IPI00254471.6
1379.57	DVnCSVMGPQEK;nASCLADSQDNGK	1		0.70969	DVncSVmGPQEK	IPI00022810.2;IPI00171323.3;IPI00166928.2
1165.52	AFnHSSNFNK;VnETEMDIAK;AIEENNnFSK	1		0.99304	VnETEmDIAK	IPI00001344.4;IPI00021997.1;IPI00479997.4;IPI00921996.1
2307.18	VSVNTAnVTLGPQLMEVTVYR		1	0.06942	VSVnTAnVTLGPQLmEVTVYR	IPI00001592.1;IPI00940949.1
1661.68	YDPQFGDAFWnSSK	1		0.77624		IPI00016070.3
1256.59	DIYTFDGALnK	1		3.1642	DIYTFDGALnK	IPI00216514.6;IPI00216516.5;IPI00374740.3;IPI00872082.1
4316.16	TILPAAAQDVYYRDEIGnVSTSHLLILDDSVEMEIRPR		3	0.70553		IPI00025874.2
2468.15	LGSSDILnYSGNLMEPPFQNQK;FQGHGIPIWCWSCHnGSALLK	1		1.6101		IPI00022386.2;IPI00061280.7;IPI00301793.4;IPI00448020.1
1726.77	GDVSNLDPnFSFEGTK;FGILSNCnHTYCLK	1		2.0417		IPI00008986.1;IPI00033350.3;IPI00921845.1;IPI00946774.1;IPI00973591.1
537.255	nFTR;TFnR		1	0.69495		IPI00006099.1;IPI00375452.3;IPI00018748.3;IPI00217850.3;IPI00747877.3;IPI00853191.2;IPI00946143.1
807.368	LnGSDSSK	1		1.2369		IPI00924538.2
774.413	nTTIPTK;nLTEGLK;nGTEILK;EIInASK;ILnETGK;AILnDTK;InDTIAK	1		2.0432		IPI00003865.1;IPI00007702.1;IPI00007765.5;IPI00037070.3;IPI00005634.3;IPI00023283.3;IPI00179357.2;IPI00375498.3;IPI00759542.1;IPI00759613.4;IPI00759637.1;IPI00759754.1;IPI00024163.1;IPI00170972.2;IPI00293009.4;IPI00412712.2;IPI00465142.2;IPI00783895.5
659.386	SVIVnK;LnITAK;nATLLK	1		1.8359		IPI00332932.3;IPI00847498.1;IPI00852735.1;IPI00888207.1;IPI00002375.3
1765.88	nISGVVLADHSGAFHNK	1		0.54857		IPI00021983.1;IPI00375688.1
1176.53	EFTDYLFnK	1		2.3645		IPI00020131.1;IPI00020134.2
3598.73	MTFQFnFTIEDHLENELTPIRDGALTLDSSK	1	1	0.84778		IPI00009815.1
2034.87	LYGHGYEIFCVTCnSSK	1		0.46813		IPI00015560.7;IPI00289763.2;IPI00304246.2;IPI00470701.2
745.401	ILnGSNK;VANnISK	1		3.6803		IPI00002790.3;IPI00555723.1;IPI00396243.6
671.361	TLPAnR		1	1.0518		IPI00289776.4;IPI01014189.1
1572.69	NFPDAFEYNnVSR;YSSnHTEHSQNLR		1	1.393		IPI00026270.1;IPI00328488.7;IPI00604401.2
3807.85	EMAQYASnITSVLCQFPSQQIANILDSHAATLNR;GHEVEDVDLELFnTSVQLQPPTTAPGPETAAFIER;FCQTCQQLLLPDDWGQHSEHQVLGnVSITQLR		1	0.6607	GHEVEDVDLELFnTSVQLQPPTTAPGPETAAFIER	IPI00011569.2;IPI00396015.5;IPI00396018.1;IPI00847501.1;IPI00384722.2;IPI00419642.4;IPI00880178.1;IPI00401051.3
1010.47	LESTYQnR;NIETnYTR		1	1.1256		IPI00061728.4;IPI00383249.2;IPI00655806.1;IPI01009829.1;IPI01012178.1
1125.52	GSnYSEILDK	1		3.9985	GSnYSEILDK	IPI00029723.1
831.47	nVSSLLAK;LnVSLASK;TVAnVTVK	1		0.53367		IPI00002580.2;IPI00218013.6;IPI00395828.6;IPI00657858.1;IPI00306305.1;IPI00883737.2;IPI00893234.1
1839.9	ATnESEDEIPQLVPIGK;LLFFENYEHnTSVVK	1		0.79754		IPI00008708.5;IPI00018980.1
959.461	nSTSIYFK	1		1.7685		IPI00017529.1;IPI00942320.1;IPI00984332.1
1244.61	FnHTQTIQQK;MHDSGLLnITK	1		0.82492	FnHTQTIQQK	IPI00333776.6;IPI00333777.6;IPI00333778.6;IPI00415032.2;IPI00873446.2;IPI00427595.1
1026.51	NFVITYnR		1	0.36917		IPI00002816.1
1728.81	GnLSPSVEKESQPDNK;DNYFSLPVnKTDTSK	2		1.2891		IPI00217620.4;IPI00872410.3
1595.75	TFTWnSSFNQHVK	1		0.46861		IPI00003271.3
1470.67	TVLEnSTSYEEAK	1		1.1061	TVLEnSTSYEEAK	IPI00013698.3;IPI00418446.4
1409.68	GGNLPPVSPnDSGAK	1		1.1785		IPI00745978.3;IPI00790098.3;IPI00793355.3;IPI00796104.3
1301.68	nSTIEAANLAGLK	1		0.91899	nSTIEAANLAGLK	IPI00299299.3
2107.96	YSLnVTYNYPVHYFDGR		1	1.1166	YSLnVTYNYPVHYFDGR	IPI00019381.4;IPI00062679.4;IPI00760748.1
632.313	nLTER;InETR;ITEnR;nITER;EnLTR		1	0.40134		IPI00011919.1;IPI00031631.1;IPI00103058.1;IPI00019056.4;IPI00869122.1;IPI00024282.1;IPI00029324.1;IPI00219026.1;IPI00456683.1;IPI00784161.1
1705.89	DVTELQILGEISFnK	1		0.84236		IPI00007205.2
1255.65	VKIYTFnQSR	1	1	1.3733		IPI00329331.6;IPI00395676.1
1117.58	VQPFnVTQGK	1		0.94846	VQPFnVTQGK	IPI00009030.1;IPI00739827.1
1751.91	nVTHLLQQELTEAQK;LISLVVSSETIDFSnK	1		0.18372	nVTHLLQQELTEAQK	IPI00026241.1;IPI00008231.2
2448.13	MEMPSTPQQLQnLTEDIRER		2	1.4545		IPI00013976.4
944.414	SCHTGInR;HnSTGCLR		1	0.22362	HnSTGcLR	IPI00029275.2;IPI00218301.1;IPI00291262.3;IPI00400826.1;IPI00954954.1;IPI00976752.2;IPI00978715.1
1785.87	EEEAIQLDGLnASQIR		1	0.25061	EEEAIQLDGLnASQIR	IPI00027230.3
1551.83	HILELSnLTIQDR;VFVQTPTInYTLR		1	0.95666		IPI00023283.3;IPI00179357.2;IPI00759542.1;IPI00759613.4;IPI00759637.1;IPI00759754.1;IPI00301459.2
975.433	AEnGTGSSPR		1	0.38282		IPI00644775.2
1668.84	TVIRPFYLTnSSGVD		1	1.5168	TVIRPFYLTnSSGVD	IPI00023673.1
859.517	LKPLFnK	2		0.99631		IPI00025049.1
2050.95	EnESQANLQLVCFTELR;HPYPALAMnASMSSLVSSR		1	0.43579		IPI00303317.2;IPI00885200.1;IPI00010396.1
1984.98	FLGDSAnLSILSGSPGFFR		1	3.2177		IPI00216684.1;IPI00216685.1
1429.65	IDSEGGVSAnHTSR;VWnSTFIEDYR		1	5.0416	VWnSTFIEDYR	IPI00019912.3;IPI00215995.1;IPI00290043.2
2126.98	EnLTAPGSDSAVFFEQGTTR;VPVHHTWGNHEFYnFSR		1	0.021141	EnLTAPGSDSAVFFEQGTTR	IPI00017601.1;IPI00025025.7;IPI00744968.3
849.459	FnISLQK	1		3.6292		IPI00398020.7
1936.98	DFEDLYTPVnGSIVIVR		1	0.76012	DFEDLYTPVnGSIVIVR	IPI00022462.2
1859.89	GQSYSVnVTFTSNIQSK	1		3.1694	GQSYSVnVTFTSNIQSK	IPI00940960.1
2162.98	MEMPSTPQQLQnLTEDIR		1	0.43284	mEmPSTPQQLQnLTEDIR	IPI00013976.4
1801.78	TAVnCSSDFDACLITK	1		2.7598	TAVncSSDFDAcLITK	IPI00011302.1
1955.9	GVFAGTNTGPnNSnTTFQK;LLEQEHIEInDTDSDGK	1		1.3886		IPI00006079.1;IPI00413671.1;IPI00413673.1;IPI00015864.1
1410.64	ENTFTIEnESVK;SFnYSSALEQHK	1		0.65906		IPI00015560.7;IPI00289763.2;IPI00304246.2;IPI00470701.2;IPI00955961.1
822.351	GLnDTMR		1	9.8551		IPI00297860.1
1395.59	NMETPSTSnVSGR		1	2.0399		IPI00018808.5
1233.57	SAEFFnYTVR		1	0.71662	SAEFFnYTVR	IPI00030255.1
2024.03	HLnASNPTEPATIIFTAAR		1	2.4355	HLnASnPTEPATIIFTAAR	IPI00168878.1
1145.59	AEnSSLNLIGK;TILNLENSnK;EVAnSTANLVK;VPGnQTSTTLK	1		3.6657	VPGnQTSTTLK	IPI00006451.7;IPI00217357.2;IPI00939119.1;IPI00298994.6;IPI00334532.3;IPI00871467.2
2075.08	EIKQMLLDAVPLSCnISK	2		0.40679		IPI00328584.1;IPI00387123.3;IPI00552288.1;IPI00552583.2
1198.57	FQnITDFWK	1		1.1343	FQnITDFWK	IPI00043598.2
1423.7	AGPnGTLFVADAYK	1		0.96093	AGPnGTLFVADAYK	IPI00031131.4;IPI00929530.1
1595.79	MLTQGVFDnLSNLK	1		1.3977		IPI00001633.1
1749.83	FAVAESDCNLAVALnR		1	1.3623		IPI00002408.4;IPI00448515.1
1712.85	VNRFnSTEYQVVTR		2	0.48542	VNRFnSTEYQVVTR	IPI00020557.2
979.522	VIYnLTEK	1		1.3398		IPI00470649.3;IPI00607732.1
1619.77	QFnATTIPENDIEK	1		1.9414		IPI00017603.1
1263.6	GGPnASSSSATISK;TSIPTINMEnK	1		4.414		IPI00215882.2;IPI00215995.1;IPI00290043.2
1416.64	nVTEMAMNPHIK	1		0.90196		IPI00031554.1
1465.66	DMnQTLGDnITVK	1		1.2344		IPI00154588.3
2050.98	LQNEIDQELEHnNSLVR;FLSSSPHLPPSSYFnASGR;EnESQANLQLVCFTELR		1	0.29404	FLSSSPHLPPSSYFnASGR	IPI00168698.1;IPI00298237.8;IPI00909516.1;IPI00303317.2;IPI00885200.1
928.523	nISPIKEK	2		1.9969		IPI00027563.4;IPI00639866.3;IPI00797562.5
725.324	nFSTEK	1		1.8257		IPI00217804.6
1016.58	ESnITVLIK	1		0.61748		IPI00235622.1;IPI00290039.7
2024.03	HLnASNPTEPATIIFTAAR;GLGLGAnLTEAQALTPTGPSR		1	1.9164	HLnASnPTEPATIIFTAAR	IPI00168878.1;IPI00024255.2
1833.78	FnYSVQEESDTCLGGK	1		2.4301		IPI00002203.6;IPI00786906.1
2352.18	AIGQTELnASNPEEVLQLAAQR		1	0.53753		IPI00375653.5;IPI00797345.1
1384.65	HnLSLHDMFVR;YnYTEDPTILR;TAFSSLSnVSSER		1	2.2957	YnYTEDPTILR	IPI00032162.1;IPI00216686.1;IPI00401044.2;IPI00552671.3;IPI00642259.6;IPI00956289.3
1347.67	SPSLNLLQnKSM	1		0.87915		IPI00021917.1;IPI00554774.1
981.415	DQGSAYAnR		1	3.1095	DQGSAYAnR	IPI00410488.2;IPI00441094.1;IPI00719044.1
2224.14	YSEVFEAInITNNERVVVK;AGLEPFFDFIVSInGSRLNK	1	1	0.75448		IPI00020602.1;IPI00743931.3;IPI00941614.1
2284.02	WGQTPInQSTPWDTDEPPSK	1		1.4535		IPI00888984.2
2063.02	DRTNIQDnESTLEVTSLK;TLAGEnQTAFEIEELNRK;DALnVSQAWRWSLPYEK;VRYFHDDDnLSLNDLVK	1	1	0.77131	TLAGEnQTAFEIEELNRK	IPI00012500.1;IPI00514398.1;IPI00298281.4;IPI00301494.2;IPI00065515.6;IPI00878006.2;IPI00879290.2
1906.93	KLMQVnDTLTSEDAGLR;IYDALDnRTLATYSYK;YKPDTLAVAVEnGTGTDR	1	1	2.5118	YKPDTLAVAVEnGTGTDR	IPI00010272.4;IPI00022091.3;IPI00376312.1;IPI00376313.1;IPI00396658.3;IPI00845516.1
3160.37	EnGTDTVQEEEESPAEGSKDEPGEQVELK	2		0.53389	EnGTDTVQEEEESPAEGSKDEPGEQVELK	IPI00000877.1
1359.62	AGHFQnTSSPSAR		1	0.75296	AGHFQnTSSPSAR	IPI00006097.3
1015.59	LLNnLTSIK	1		0.60945	LLnnLTSIK	IPI00298281.4
1457.78	LNnITIIGPLDMK	1		1.0215		IPI00395903.1
1710.78	nESPPQVPVYnNSHK	1		1.9497		IPI00100798.2
1554.65	MNLnTSSNTGDTQR		1	1.2714		IPI00167498.3;IPI00414037.2
1076.44	SQHGSGMSnR		1	0.97866		IPI00032496.2;IPI00337550.1;IPI00645911.2
1929.92	nFTLEQIVTYVADTCR;LYITVNDFEFHVYnR;TLFTENHLGLHSGnFSR		1	0.5815		IPI00470806.4;IPI00477650.3;IPI00251161.8;IPI00398012.8;IPI00852643.3;IPI00853372.3;IPI00885111.2;IPI00885130.2;IPI00480103.3;IPI00922140.1
845.45	AnATIEVK;LLnQTEK	1		1.7771		IPI00011578.1;IPI00018311.1;IPI00654584.7;IPI00657724.1;IPI00964352.1;IPI00023736.2
1545.68	VnFTLEASEGCYR		1	1.8411		IPI00291755.6;IPI00871723.1
1450.66	ELDLTCnITTDR		1	0.57333	ELDLTcnITTDR	IPI00022048.8
1800.88	VSPQDANPLMAnGTLTR		1	0.6839		IPI00182469.4;IPI00182540.7;IPI00219869.1;IPI00219870.1;IPI00219872.1;IPI00219873.1;IPI00845519.1;IPI00942869.1
1187.64	SnATASIPSLVK	1		1.6169		IPI00006375.1
1144.57	VLEAVnGTDAR;SASADnLTLPR;nESGVQLIER		1	1.8334	VLEAVnGTDAR	IPI00024811.1;IPI00334743.4;IPI00413625.1;IPI00465457.4;IPI00410188.4;IPI00885204.1
1186.66	NNVITLnITGK	1		2.1143	NNVITLnITGK	IPI00441550.4;IPI00927191.2;IPI01012577.1
1513.69	AEPPLnASASDQGEK	1		0.66072	AEPPLnASASDQGEK	IPI00000877.1
1541.79	IPAInQTITEANEK	1		1.0702	IPAInQTITEANEK	IPI00298281.4
2531.27	LPnSTIYVVEPGYLGFTVHPGDR		1	1.2757	LPnSTIYVVEPGYLGFTVHPGDR	IPI00291755.6;IPI00871723.1
3153.54	QTVHFQISSQLQFSPEEVLGMVLnYSR		1	0.82033		IPI00000877.1
1669.89	KIPAInQTITEANEK	2		0.53675	KIPAInQTITEANEK	IPI00298281.4
2325.05	VQLQDGGEYTCVASNVAGTNnK	1		1.236		IPI00045512.3;IPI00657877.1;IPI00871227.1
889.439	EGDnITLK;DnLTAVEK	1		4.56		IPI00015102.2;IPI00807403.1;IPI00025323.7
1930.02	QNnFSLAMKLLKELHK	3		1.0323		IPI00296337.2;IPI00376215.2
1442.64	DIYEMnLSQWK;DLnETIHYMYK	1		0.22742	DLnETIHYmYK	IPI00032142.1;IPI00293303.1
2367.11	KIQQESLGSAPLMGDDHPnASR;GDnSSVSSLCISPDGKMLLSAGR	1	1	0.51444		IPI00455473.2;IPI00739902.2;IPI00937477.1
1402.74	TGALTVQnTTQLR		1	2.0407		IPI00940698.4
959.565	VTKGnVTIK	2		0.93261		IPI00940959.1
2873.29	SVSnSTQTSSSSSQSETSSAVSTPSPVTR		1	0.65493		IPI00335259.8;IPI00374033.2
1133.53	LCLEEnLSR		1	0.71742		IPI00019430.5;IPI00974032.2
1466.7	LHVTLYnCSFGR		1	1.1907		IPI00853369.1
1374.74	LVQLFPnDTSLK	1		1.0721	LVQLFPnDTSLK	IPI00294834.6
2035.83	EnGTDTVQEEEESPAEGSK;GFEVYLAEMSADnQTCGK	1		0.61868	EnGTDTVQEEEESPAEGSK	IPI00000877.1;IPI00165434.4;IPI00514265.1;IPI00940874.1
1215.59	HTNMnLTQLK;nDTSLPSVAPSK	1		0.71215	HTnmnLTQLK	IPI00014958.1;IPI00290945.2;IPI00742670.2;IPI00151988.4
2035.86	GFEVYLAEMSADnQTCGK	1		0.36889		IPI00165434.4;IPI00514265.1;IPI00940874.1
1525.73	EMLIAQnSSLEFK;YSVAnDTGFVDIPK;AFSQHSnLTQHQK	1		0.69798	YSVAnDTGFVDIPK	IPI00009707.5;IPI00012887.1;IPI00293575.9
1028.48	LGHGnSSTQK;QSSnLTNHK	1		2.6984		IPI00022479.6;IPI00477192.4
1645.79	YFFnVSDEAALLEK	1		1.1877		IPI00013744.1
1393.61	InSSTENSDEGLK	1		0.6622		IPI00477535.6;IPI00848102.3
2497.13	CLAPIAnTTNGQGCTDYVSEVVK;EAESLQPMTVVGTDYVFHnDTK	1		1.1777	EAESLQPmTVVGTDYVFHnDTK	IPI00142538.5;IPI00646645.4;IPI00719643.4;IPI00853369.1
2373.13	TSLELWMHTDPVSQKnESVR	1	1	0.63862		IPI00021983.1;IPI00375688.1
1159.6	EnITIVDISR;GHTLTLnFTR		1	1.0883	GHTLTLnFTR	IPI00031064.1;IPI00884105.2
1857.86	NMMnHSQVGQGIGIPSR;TPMTnSSIQFLDNAFR		1	2.281	TPmTnSSIQFLDNAFR	IPI00005011.1;IPI00017733.2;IPI00410623.1;IPI00012102.1
1521.68	EDALnETRESETK	1	1	0.51109		IPI00291262.3;IPI00400826.1;IPI00954954.1;IPI00976752.2
1508.77	SLGQFLSTEnATIK;VVNANQnASPNVPGK	1		3.9489	SLGQFLSTEnATIK	IPI00017562.1;IPI00164345.1;IPI00410232.3;IPI00410234.1;IPI00741005.7;IPI00943971.1
1995.06	LVALAVIDEKnTSVEHTR	1	1	1.5538	LVALAVIDEKnTSVEHTR	IPI00064193.3;IPI00555585.3
860.424	QQLnETK	1		0.55224		IPI00171500.5
1138.63	GVTHLnISGLK	1		0.075555	GVTHLnISGLK	IPI00020557.2
1970.93	LQGLENWGQDPGVSAnASK	1		1.426	LQGLENWGQDPGVSAnASK	IPI00220556.5;IPI00332106.2;IPI00645060.1
831.409	AInDTAAR		1	3.1323		IPI00025846.3;IPI00220146.1
1818.92	LSALDNLLnHSSMFLK	1		0.47963	LSALDNLLnHSSmFLK	IPI00000877.1
1919.77	NPCTSEQnCTSPFSYK	1		1.3848	NPcTSEQncTSPFSYK	IPI00217561.2;IPI00217562.5;IPI00217563.4;IPI00293305.4;IPI00549336.2
1343.64	FnSTEYQVVTR		1	0.16314	FnSTEYQVVTR	IPI00020557.2
3041.51	GMGILGLINLVYFSEnYTSEAHQILSR;VVFLSPAVPEEPEAYnLTVLIEMDGHR		1	1.1596	VVFLSPAVPEEPEAYnLTVLIEmDGHR	IPI00217918.1;IPI00853369.1
2167.05	VLGQSQEPNVNPASAGnQTQK	1		2.4127	VLGQSQEPNVNPASAGnQTQK	IPI00184474.8;IPI00382815.5;IPI00413788.2
1019.48	ATnDSVVADK;InLSSDQnK;TGnVSSEPTK	1		1.7039		IPI00027933.3;IPI00167841.2;IPI00411827.4;IPI00183699.3;IPI00300222.6
1459.65	DYnYSLLGGGASSR		1	1.4818		IPI00221382.3
2125.08	VInQTTCENLLPQQITPR;ALSALLPCAVSGNEVnISPGR;IFPSGnVTSVLELSSNPAHR;nLTVIFADTLQGYGFPVNR		1	1.3954	VInQTTcENLLPQQITPR	IPI00001922.1;IPI00005826.2;IPI00398020.7;IPI01013822.1
1929.96	HLGSYLLDSEnTSGALPR		1	0.094177		IPI00018412.2;IPI00215781.1;IPI00215782.1;IPI00215783.1;IPI00848258.1
1568.82	NYPFVnRTAVMIK;IQKMVYSInLTSR	1	1	1.4123		IPI00024214.1;IPI00154813.1;IPI00855862.1
1465.77	LAVTnTTMTGTVLK	1		1.4476	LAVTnTTmTGTVLK	IPI00299063.2
1180.54	EnATVMDKTR	1	1	0.97616		IPI00021800.1;IPI00219307.1
2101.04	LFLFSYATAAQnNTVTDPK;YEGILYTIDTEnSTVALAK	1		0.65314		IPI00061280.7;IPI00301793.4;IPI00448020.1;IPI00410590.5;IPI00478300.2
721.368	AEFLnK;MnITVK;LPnYSK	1		2.4803		IPI00014516.2;IPI00218694.1;IPI00218695.1;IPI00333771.1;IPI01013595.1;IPI00215995.1;IPI00290043.2;IPI00470597.5
1929.9	nFTLEQIVTYVADTCR		1	0.9966		IPI00470806.4;IPI00477650.3
2057.02	DVPGRILLDIDnDTESTAL		1	1.3073		IPI00064767.3;IPI00168527.2;IPI00386947.4;IPI00830020.1
1294.54	KQIDQQnCTC	1		3.0213		IPI00106502.5
1527.78	TTQQnISAVFYKK	2		1.01		IPI00872370.2
3359.57	VVRPDSELGERPPEDnQSFQYDHEAFLGK	1	2	0.41625	VVRPDSELGERPPEDnQSFQYDHEAFLGK	IPI00015842.1
1687.74	IFAMDEnLSSIMER;GTnTSSPYDAGADYLR;ELGVVMYnCSCLAR		1	4.4586	ELGVVmYncScLAR	IPI00000728.3;IPI00219504.1;IPI01015293.1;IPI00183642.2;IPI00328243.2
1554.67	MNLnTSSNTGDTQR;QnGSTQSCQELFR;DInESDEVEVYSR		1	1		IPI00167498.3;IPI00414037.2;IPI00168810.2;IPI00219791.3;IPI00385623.1;IPI00215720.1;IPI00215721.1;IPI00215723.1;IPI00215724.1;IPI00215725.1;IPI00412343.2;IPI00645666.1;IPI00783298.1
1936.96	DFEDLYTPVnGSIVIVR;YGELIVLGYnGSLPNGDR		1	0.41555	DFEDLYTPVnGSIVIVR	IPI00022462.2;IPI00034167.1
2382.21	YLQPLLAVQFTnLTMDTEIR		1	1.0464		IPI00747849.2;IPI00871221.1
1339.61	NELMLnSSLMR		1	1.1524	NELmLnSSLmR	IPI00374563.3
1348.7	SVnFSLTPNEIK	1		0.8278		IPI00008868.4
1935.93	LnQTEPVAGNYYPVNTR;QVSLESnASMSSNTPLVR		1	0.86956	LnQTEPVAGnYYPVNTR	IPI00012989.2;IPI00027174.1;IPI00220253.1;IPI01013721.1
1269.69	AAVPKnVSVAEGK	2		1.7626		IPI00022048.8
1727.8	FLEFGPEnCTSWIK;DVACGAnHTLVLDSQK	1		1.776		IPI00177437.5;IPI00219317.3;IPI00219318.3;IPI01011870.1;IPI00465044.2
1950.97	EWIAYLVTPnGSnKTTR;LNTGMDSGGSLTISLRAnK	1	1	0.67133		IPI00259113.1;IPI00885066.2;IPI00289131.4
2995.51	VSKLGnETHFLFFGLYPGTTYSFTIR	1	1	0.86696		IPI00293849.4
2560.18	MYSEGSDIVPQSnETALHYFKK;QnYSSKNENCVEETFEDLLLK;TEMVSSVPAEnKSVLNEHQETSK	2		1.241		IPI00002790.3;IPI00059925.4;IPI00175146.5;IPI00743894.2;IPI00178568.1;IPI00884155.3;IPI00915755.1;IPI00927406.1
1479.7	SHTLnHTFFYGR;nLSVSCAAASVASSR;NLnNSQSDVVSFR		1	3.055	NLnnSQSDVVSFR	IPI00103874.7;IPI00219036.5;IPI00306604.5
1535.75	nLTIEDPAVYLCK;DGQLLPSSnYSNIK	1		2.7028	DGQLLPSSnYSNIK	IPI00220661.1;IPI00220737.1;IPI00411478.3;IPI00435020.3;IPI00795918.1;IPI00900302.1
1749.87	AEYnVTITVTDLGTPR		1	0.1389		IPI00009033.2
2175	QQMENYPKNnHTASILDR	1	1	0.47647		IPI00215998.5
930.502	nISQVLEK;QVLnITDK;AVSVAEInK	1		1.6034		IPI00013897.1;IPI00645614.2;IPI00747243.2;IPI00784002.3;IPI00795015.2
2336.18	ILAPAYFILGGnQSGEGCVITR;LIHPTEnITFHAVSSVVnNSR		1	0.55024	ILAPAYFILGGnQSGEGcVITR	IPI00013698.3;IPI00418446.4;IPI00024618.2
1274.64	AAIPSALDTnSSK	1		1.5705	AAIPSALDTnSSK	IPI00023673.1
1683.81	LAnLTQGEDQYYLR		1	0.46948	LAnLTQGEDQYYLR	IPI00291262.3;IPI00400826.1;IPI00954954.1;IPI00976752.2;IPI00978715.1
758.417	nVSTPIK	1		0.8281		IPI00410215.6
1910.93	YSVAnDTGFVDIPKQEK;LSHPGHFWKSADInSSK;GWSGPKPGFPEPTnNTPK	2		1.7348	YSVAnDTGFVDIPKQEK	IPI00012887.1;IPI00013384.5;IPI00164481.2;IPI00300789.1;IPI01009003.1;IPI01009624.2
1889.87	AESTLQnSSSAVHTESNK;SPDASSAFSPASPATPnGTK	1		2.9074		IPI00016542.6;IPI00301647.4;IPI00411438.1
2715.18	NDHEIInCSNCESVGTNADTPVLR		1	0.5512		IPI00328131.7;IPI00745920.2
689.36	ELnVSK;nESVLK;LVDTnK;VnESIK;DLnLSK;LDISnK;VnLSEK;LVESnK;LVnDTK;LnDSLK;EVnLSK	1		0.56478		IPI00009286.4;IPI00218500.6;IPI00017506.1;IPI00299333.1;IPI00017562.1;IPI00164345.1;IPI00410232.3;IPI00410234.1;IPI00017940.3;IPI00026969.4;IPI00473012.1;IPI00152667.3;IPI00744916.3;IPI00970963.1;IPI00183294.4;IPI00296365.4;IPI00619925.2;IPI00868715.1;IPI00900325.1;IPI00183445.1;IPI00410210.1;IPI00248651.4;IPI00745230.2;IPI00298306.5;IPI00397930.3
2065.07	KDFEDLYTPVnGSIVIVR	1	1	0.45291	KDFEDLYTPVnGSIVIVR	IPI00022462.2
957.47	HMSLALnR;nSSFHPIR		1	1.0541	HmSLALnR	IPI00025869.1;IPI00217914.4
1940.94	LQNnISYQMADIHHLK	1		0.59155	LQnnISYQmADIHHLK	IPI00304892.2;IPI00374590.4;IPI00383014.2
1558.68	TGVNSGVMLMnMTR		1	3.4644	TGVNSGVmLmnmTR	IPI00217652.5;IPI00791310.3
1318.71	KWnVTSLETLK;IASAVQKnATSTK;EIKIGPFAnTTK	2		0.6292	IASAVQKnATSTK	IPI00025110.5;IPI00793522.1;IPI00793649.1;IPI00798210.1;IPI00298281.4;IPI00398020.7
945.478	nATLAEQAK;DAVNnITAK	1		0.6076	nATLAEQAK	IPI00000877.1;IPI00953206.1;IPI00953262.1;IPI00953650.1;IPI00978064.1;IPI01015859.1
2505.24	IQLDEPDHDPVEIILnTSDLTK;AHCVWLECPIPDAPVVTnVTVK	1		2.5511		IPI00023586.6;IPI00747900.2;IPI00215995.1;IPI00290043.2
1642.78	HLLEnSTASVSEAER;AFnWSSHLQIHMR		1	1.5907	HLLEnSTASVSEAER	IPI00002478.1;IPI00216758.1;IPI00216760.1;IPI00216762.1;IPI00166563.3
1836.89	LMQEEEMNILInLSK;GIFWEPFAnVTVEEAK;ANIQFGDnGTTISAVSNK	1		0.4885	ANIQFGDnGTTISAVSNK	IPI00008282.2;IPI00171816.2;IPI00221139.8;IPI00221140.2;IPI00335536.2;IPI00377231.1;IPI00395021.1;IPI00395024.1;IPI00399272.1;IPI00178512.7;IPI00830022.1;IPI00830049.1;IPI00217766.3
2470.1	GMGDHAFHTNARDALnVSQAWR;RnTSTSSSASGGLGMTVEGPEGSER		2	1.3856		IPI00301494.2;IPI00411980.3;IPI00807610.1
1198.56	GLnSTHIGEDR;nSTIASHQNAR		1	1.5187		IPI00607602.2;IPI00642245.5;IPI00789011.1;IPI00791609.2;IPI00843995.1;IPI00921808.2
1934.92	LGATLANGnQSEEAVAAYR;VLIDLFIWNDDQnSSR;DSSFGQnDSPTVLPITTR;TLAGEnQTAFEIEELNR		1	0.50806	TLAGEnQTAFEIEELNR	IPI00032931.2;IPI00165272.5;IPI00384805.3;IPI00044461.7;IPI00785061.1;IPI00295701.2;IPI00298281.4
2155.07	LLVPYVVnVSWATQYCSR		1	0.29187		IPI00021531.7
1747.83	FnSSVLSFEIKnMSK	2		1.5224		IPI00060419.3
1175.6	DSLSInATNIK;LnSSTEANVIK	1		3.8952	DSLSInATNIK	IPI00018274.1;IPI00221346.1;IPI00221347.1;IPI00221348.1;IPI00453458.3;IPI00761043.1
1564.69	SVNPnDTCLASCVK	1		2.4871	SVNPnDTcLAScVK	IPI00000735.5
2302.03	CLSPDVTPCFCTInFTLEK	1		1.8679		IPI00019381.4
709.303	QYEnR;MVnSSR		1	0.91737		IPI00020406.3;IPI00299040.2
1681.82	TAnDTSTEAYNLLLR		1	0.55808	TAnDTSTEAYNLLLR	IPI00298281.4
1490.68	AFSnDSSLTQHQR		1	1.3212		IPI00065675.1
3157.51	EGSRTDDEVVQREEEAIQLDGLnASQIR		3	0.48634	EGSRTDDEVVQREEEAIQLDGLnASQIR	IPI00027230.3
1819.79	SEAPnSSEEDSPIKSDK	2		0.80735		IPI00217773.2;IPI00845256.1;IPI00845511.1
1762.78	SDFSQTMLFQAnTTR;GHIFCCnLSVSESPR		1	1.7717		IPI00011651.3;IPI00796281.3;IPI00303373.7;IPI00645390.1;IPI00867660.2
1469.82	LTIVnSSVLDRPR;RSVNILFnLTHR;VALATLnRTNLQR		2	1.2607		IPI00022608.2;IPI00022674.2;IPI00807681.1;IPI00847948.1;IPI00848268.1
1484.62	YTFYAGEnMTSGK	1		1.0391		IPI00375498.3;IPI00939967.1
1834.86	VPPTLnSSPCGGFTLCK;EGSGYFFLnTSTADVVK	1		0.81215	EGSGYFFLnTSTADVVK	IPI00002251.1;IPI00291755.6;IPI00871723.1
1293.59	DnHTHSDIQVK	1		2.5013	DnHTHSDIQVK	IPI00328243.2
1975.01	ALKnNSNDIVNAIMELTV	1		0.46805		IPI00007471.2
1236.6	RNVnFSAAETK	1	1	0.89909		IPI00010369.2
1613.76	LNPTVTYGnDSFSAK	1		0.0636	LnPTVTYGnDSFSAK	IPI00008494.4
2599.23	DQnRSIFSVHCNVPLAHDFTNK;TMVFPVMYLnESVHIDKETASR;SVTVNHMSDnRSMSVDLSHIPLK	1	1	0.49461	TmVFPVmYLnESVHIDKETASR	IPI00017203.6;IPI00217766.3;IPI00479669.1
2277.15	LLnTTDVYLLPSLNPDGFER		1	4.7073	LLnTTDVYLLPSLNPDGFER	IPI00027078.3
879.376	DAMnLSGR;ITnCSER		1	3.5045		IPI00004472.2;IPI00397592.2;IPI00412748.4;IPI00972952.1;IPI01013396.1;IPI00847958.1;IPI00884972.1
2757.36	SLDAYPILNQAQALEnHTEVQFQK	1		2.6601	SLDAYPILnQAQALEnHTEVQFQK	IPI00215995.1;IPI00290043.2
835.404	SLSnSTAR;STSAnISR		1	0.96192		IPI00032140.4;IPI00473029.4;IPI00478577.2;IPI00854572.4;IPI00930175.1
1163.58	EIFVAnGTQGK	1		1.099		IPI00022558.2;IPI00410607.4;IPI00760547.1
1430.7	VNDnKTAAEEALR	1	1	0.99068	VNDnKTAAEEALR	IPI00298281.4
1858.84	LFTCGTNAFTPVCTnR;EIYRTMnISPEQPQH;VnDSVPFHLGWnSTER		1	1.2349		IPI00013880.2;IPI00026969.4;IPI00456649.2
2027.97	VASVININPnTTHSTGSCR		1	0.78093	VASVININPnTTHSTGScR	IPI00009030.1;IPI00739827.1
1420.66	YNSHSLEnESIK	1		0.6805		IPI00748788.2
1338.58	EQYIHEnYSR;ELSSGnESSSSVR		1	0.24316	EQYIHEnYSR	IPI00030255.1;IPI00250716.2;IPI00289944.6;IPI00746752.2
860.5	IYIPLnK	1		0.98261		IPI00021983.1;IPI00375688.1
1593.81	AMYVnLTLTGEPIR		1	0.019174		IPI00044600.3
2765.29	CFTEIQGEnVTLGDDPSQPQTTISK;YSVQLMSFVYnLSDTHLFPnASSK	1		0.75582	YSVQLmSFVYnLSDTHLFPnASSK	IPI00023339.2;IPI00884105.2
1923.97	IAVISDMAFQnLTSLER		1	0.85135		IPI00001633.1
1393.67	AAnYTSSLNLPDK;NIVNnYSEAEIK	1		1.0181		IPI00023807.3;IPI00915390.1;IPI00397379.2;IPI00397381.5
1802.04	IAPASnVSHTVVLRPLK	1	1	0.44343	IAPASnVSHTVVLRPLK	IPI00425902.4
2072.77	EQQLESCACnETDNSCK	1		2.5603	EQQLEScAcnETDNScK	IPI00029606.1;IPI00288894.1
1359.66	GSKDnATDSVPLR;SVKEIEnSSPNR;nQSDADLEALRK	1	1	0.25832	GSKDnATDSVPLR	IPI00020557.2;IPI00289861.4;IPI00550431.1;IPI00337588.1;IPI00939154.3
1599.73	EnSTDYLYPEQLK;EDLPnSSTSFLFDK	1		1.1129		IPI00296180.4;IPI00645018.2;IPI00328195.6
2348.21	VLAGAVIGDGQSAVASNIAnTTYR		1	0.079664		IPI00106552.4;IPI00177605.6;IPI00398257.2;IPI00855865.1;IPI00877906.1
1625.81	FnLSSSISSENSLIK	1		0.8074		IPI00102107.1;IPI00173901.1;IPI00332367.1
1674.88	TQnFTLLVQGSPELK	1		0.93994	TQnFTLLVQGSPELK	IPI00002406.2
2162.17	VAnLTEPVVLTFQHQLQPK	1		2.2379	VAnLTEPVVLTFQHQLQPK	IPI00397949.3;IPI00412420.6
933.429	EVVTDEnK	1		0.60887		IPI00642259.6;IPI01018799.1
1603.82	LLAnSSMLGEGQVLR;SSLSVQPGFLADLnR		1	1.622		IPI00018276.1;IPI00419722.4;IPI00645828.1;IPI00892924.1;IPI00871620.2
1902.91	FWLPPnVTWTELEDR;YFYLQAVNSEGQnLTR;SNPGFHGAPnSSPIHLnR		1	0.39888	YFYLQAVNSEGQnLTR	IPI00002225.6;IPI00143921.9;IPI00428403.1;IPI00783294.2
2602.38	VLSLPLnSSAVVnCSVHGLPTPALR		1	0.54253	VLSLPLnSSAVVncSVHGLPTPALR	IPI00002406.2
2429.11	FTFTSHTPGEHQICLHSnSTK	1		0.62323	FTFTSHTPGEHQIcLHSnSTK	IPI00023542.6
979.486	TASTIAnSSK;ALLEEYnK	1		0.45618		IPI00024766.1;IPI00027014.1;IPI00514971.2
1761.89	VPLQSAHLYYnVTEK	1		2.8876	VPLQSAHLYYnVTEK	IPI00045839.3;IPI00163381.4
1225.65	YHVLHInTTK;QnFTQLPLHK	1		0.22956		IPI00040900.5;IPI00549891.3;IPI00552241.1;IPI00170805.1
2097.94	DDDTASVTSLnSSATGRCLK;EVAPVTnFSDSDDTMVAKR	1	1	1.5095		IPI00009891.1;IPI00645793.3;IPI00828032.1;IPI00939191.1;IPI00016731.2;IPI00619912.2;IPI00855988.1
1989.94	TYAIYDLLDTAMInNSR		1	1.9584		IPI00100030.1;IPI00385011.1;IPI00401041.1;IPI00401043.1
703.376	LnDTIK;LnESLK;nESLLK;EnLSLK;InESIK;ELnLSK;nVTELK;nLSEIK;nISEIK;ILSEnK;nETVLK;InVTEK	1		0.96718		IPI00016475.7;IPI00293845.5;IPI00375454.8;IPI00377137.4;IPI00472363.3;IPI00154283.4;IPI00789801.2;IPI00186853.6;IPI00514056.7;IPI00893561.1;IPI00294084.4;IPI00294386.3;IPI00376344.3;IPI00414980.2;IPI00296776.2;IPI00909799.1;IPI00297121.6;IPI00375294.3;IPI00873889.1;IPI00915022.2;IPI01013822.1;IPI00012510.3
1374.64	HVYNnLTEEQK	1		0.63354		IPI00024929.2
3612.79	IQNILCEKPTVTTVYANnGSVLQGSSVASVYDGK;LLSLGATPEEPLLDFKIPDDnFSIPEGEEDLAK	2		0.86256		IPI00014958.1;IPI00396021.2
1675.86	VLPVnVTDYCQLVR		1	0.022484	VLPVnVTDYcQLVR	IPI00328113.4
1809.85	nMTFDLPSDATVVLnR		1	0.32937	nmTFDLPSDATVVLnR	IPI00884105.2
1548.74	SQSTAQnLTSDIQR;AFTQSMnLTVHQR		1	1.2926		IPI00018090.2;IPI00105638.4
2278.95	nATYGYVLDDPDPDDGFNYK	1		0.29927	nATYGYVLDDPDPDDGFNYK	IPI00941900.1
2430.19	IIISPEEnVTLTCTAENQLER		1	9.7977	IIISPEEnVTLTcTAENQLER	IPI00015102.2;IPI00807403.1
775.371	VAnESQK;nVSAEQK;GTnGTPTK;nGSLQEK;ENnITGK;nVSQEAK;KnESLGQ	1		0.22278		IPI00019427.4;IPI00215762.7;IPI00183118.5;IPI00220505.2;IPI00220506.2;IPI00220507.2;IPI00220508.2;IPI00220509.2;IPI00217225.7;IPI00472618.1;IPI00746356.4;IPI00218925.7;IPI00329638.1;IPI00335101.1;IPI00394808.1
911.424	SLnYTGEK	1		0.56101		IPI00019447.6;IPI00306518.3;IPI00784704.2
1371.69	TASVSInQTEPPK	1		3.0104	TASVSInQTEPPK	IPI00021267.2
822.448	AnYTILK;TFVnLTK	1		1.031		IPI00025846.3;IPI00220146.1;IPI00465100.1;IPI00478854.5
1259.61	ANTLDNQLTnR;LHEITnETFR;NNGnSTSLPLSR		1	0.7424	LHEITnETFR	IPI00329108.4;IPI00478672.5;IPI00395488.2;IPI00399254.3;IPI00969366.1
1403.72	THnLTDLSPHLR		1	1.6314		IPI00334532.3;IPI00871467.2
1766.71	DTCTQECSYFnITK	1		1.68	DTcTQEcSYFnITK	IPI00217561.2;IPI00217562.5;IPI00217563.4;IPI00293305.4;IPI00549336.2
1464.67	EASIVGEnETYPR;AAEIASSDSAnVSSR;TLSnSSQSELENR		1	0.62918	EASIVGEnETYPR	IPI00002790.3;IPI00031388.1;IPI00294065.7;IPI00333637.2
1718.85	GDTLCTnLTGTLLPSR;FVLInWTGEGVNDVR;IDAVAWnTTPYQLAR;nGSQTVSVSVSQALDAR		1	13.946	GDTLcTnLTGTLLPSR	IPI00031713.2;IPI00101968.3;IPI00396437.3;IPI00456925.3;IPI00604527.2;IPI00939720.2
2465.99	NNENREnASSNHDHDDGASGTPK	1	1	1		IPI00014324.3;IPI00099385.1;IPI00385592.1;IPI00385608.1;IPI00397840.1
1101.52	nWSTTDIHK	1		0.91278		IPI00006742.2;IPI00218983.2;IPI00218984.2;IPI00218985.2;IPI00218986.2;IPI00292838.5
3089.24	DEDDDCTYSYTMEGDGAPGPnSTVLVHK	1		0.88724		IPI00027422.2;IPI00220845.2;IPI00220846.2;IPI00220847.2;IPI00220848.1
1031.57	VFPQVnVTK	1		1.0154		IPI00008787.4
1416.65	DLDILHnSSQMK;nVTEMAMNPHIK	1		1.3697		IPI00018689.7;IPI00031554.1
1767.81	VYCnLSAAHTFEDLK	1		1.0386		IPI00016112.6
1875.88	DIETTTISNFHTQVnR;DINSQQELQnITTDTR		1	3.9368	DINSQQELQnITTDTR	IPI00019999.2;IPI00107831.4;IPI00465186.3
787.419	LNLASnR;LLnGSQR		1	0.95246		IPI00005826.2;IPI00045839.3;IPI00163381.4
2235.15	TQQAAQAnITLQEQIEAIHK;HnLSEVLLATMNILFTQFK;QVALQTFGnQTTIIPAGGAGYK	1		1.6367	QVALQTFGnQTTIIPAGGAGYK	IPI00017451.1;IPI00397904.6;IPI00787853.2
2002.96	YIYWTCEATNVInVTR;SIAYINSDSSIEGnYTLR		1	3.7757		IPI00000203.2;IPI00023151.1
2782.35	DVVTAAGDMLKDnATEEEILVYLEK;IPLLHISSCDQnISEKDLLDTENK	2		0.81864	DVVTAAGDmLKDnATEEEILVYLEK	IPI00012503.1;IPI00219825.2;IPI00744835.1;IPI00412408.1
688.339	nQTPTK;AQLDnK	1		0.34652		IPI00009634.1;IPI00444572.2
873.492	InLTIGSR;ALSnISLR		1	2.028		IPI00410588.4;IPI00788778.3;IPI00853369.1
1487.74	SHnRSEEFLIAGK;IPSRFFnSSSFAK	1	1	1.2196	SHnRSEEFLIAGK	IPI00032292.1;IPI00386170.3;IPI00400812.5;IPI00830086.1
2457.05	nYSHQVGNYHMGFLVSEDESK;LGIYADMGnFTCMGYPGTTLDK	1		2.6465		IPI00329605.6;IPI00414909.1
1363.69	YnHTGQVIIYR		1	0.12889	YnHTGQVIIYR	IPI00743104.2
1578.84	QFLQnATQLQLFK	1		0.61184		IPI00170641.3;IPI00449176.2;IPI00645340.2;IPI00872202.1;IPI00900334.1;IPI00922655.1;IPI00983955.1
1573.84	GVFITnETGQPLIGK	1		0.4704	GVFITnETGQPLIGK	IPI00293088.7
2402.05	MDPPCTnTTAASTYLNNPYVR		1	2.0805	mDPPcTnTTAASTYLNNPYVR	IPI00021794.8
1103.6	VKDLMVInR	1	1	0.58426	VKDLmVInR	IPI00151358.2;IPI00186429.8
1101.49	nCSnLTVHR		1	0.69556		IPI00300332.4;IPI00400871.1
602.339	InISR;LnISR;nLSLR;VnLTR;ISLnR;nITVR;nISIR;LLSnR		1	0.67524		IPI00004671.2;IPI00167941.1;IPI00290085.2;IPI00296922.4;IPI00375205.1;IPI00456478.1;IPI00456479.1;IPI00420014.2;IPI00452590.1;IPI00452591.1;IPI00452592.1;IPI00854642.1;IPI00953206.1;IPI00953262.1;IPI00953650.1;IPI00978064.1;IPI01015859.1
1227.65	EERPLnASALK	1	1	0.53335		IPI00023137.1
1091.56	VVnISSMLGR		1	0.6137		IPI00025341.2
1856.92	GnLTYGYVTILnGSDIR;CAEALVPLLSNVnVSDR		1	2.6503	GnLTYGYVTILnGSDIR	IPI00306604.5;IPI00477505.3;IPI00514769.3;IPI01009712.1
1108.62	AnHSGAVVLLK	1		0.69807	AnHSGAVVLLK	IPI00010697.2;IPI00216221.2;IPI00216222.2;IPI00216223.3;IPI00216224.2;IPI00216225.2;IPI00921080.1;IPI00921401.1
1193.63	VFGSQnLTTVK	1		0.80207	VFGSQnLTTVK	IPI00000877.1
1244.66	IETILLnGTDR		1	0.21404	IETILLnGTDR	IPI00020557.2
901.476	LnLTTDPK;TPSELInK	1		0.45077	LnLTTDPK	IPI00414717.1;IPI00641153.3;IPI00880007.2
2328.07	DVVInFSQEEWEYLDSAQR		1	0.93679		IPI00288987.5;IPI00923572.1
2308.97	nVTYGTYLDDPDPDDGFNYK	1		0.48568		IPI00045396.3
1519.8	SInVTGQGFSLIQR		1	1.7526	SInVTGQGFSLIQR	IPI00853369.1
1414.64	GnETMLDFRTSK	1	1	1.6327		IPI00298925.2;IPI00298926.4
723.38	nLTFTK	1		0.25186		IPI00298308.7
1990.85	LSTTECVDAGGESHAnNTK	1		0.95196		IPI00016112.6
1665.81	DnATEEEILVYLEK;nYSSICLPAIGTGNAK;AHIPnFTFNLGYSGK;VTGLnCTTNHPINPK	1		1.9911		IPI00012503.1;IPI00219825.2;IPI00744835.1;IPI00291215.6;IPI00783216.1;IPI00783683.2;IPI00783883.1;IPI00784370.1;IPI00738468.1;IPI00784368.1;IPI00306604.5
1572.81	TnSTFVQALVEHVK;EGIEYILLnFSFK	1		0.36769	TnSTFVQALVEHVK	IPI00012503.1;IPI00219825.2;IPI00744835.1;IPI00103165.3;IPI00386815.3
1041.58	nITIVTGAPR		1	8.8177		IPI00215995.1;IPI00290043.2
1986.97	ILLTCSLnDSATEVTGHR		1	3.2511	ILLTcSLnDSATEVTGHR	IPI00019906.1;IPI00218019.1
1631.8	nVTHIDQALQEAHR;FVEVLLQnNTPSDR		1	1.1568		IPI00456965.5;IPI00719690.3
2065.86	DYGSQEDFTQVWnTTMK	1		1.112		IPI00030936.1
1849.96	LnITNIWVLDYFGGPK;LSHDAnETLPLHLYVK	1		0.61789	LSHDAnETLPLHLYVK	IPI00021997.1;IPI00853369.1
1237.67	GSLSYLnVTRK;TFTAnISKTVR	1	1	1.9688	GSLSYLnVTRK	IPI00011229.1;IPI00250716.2
1719.69	TVLAEYnMSCDDTGK;InGSAnFSFNDEEMK	1		0.59377		IPI00168567.4;IPI00642269.2;IPI00152540.3;IPI00788676.1;IPI00795327.3;IPI00795801.1
1109.57	GSLSYLnVTR		1	0.65184	GSLSYLnVTR	IPI00011229.1
2109.9	EPGSnVTMSVDAECVPMVR;SCDnISDTGIMHLAMGSLR;CNGGAInCTNVQISDSPFR;MnLTEGPLAMAEMDPTQGR		1	0.59272	EPGSnVTmSVDAEcVPmVR	IPI00023673.1;IPI00166145.3;IPI00301109.4;IPI00470502.2;IPI00470503.2;IPI00470504.2;IPI00396374.9
999.502	FLSYnVTR		1	1.8324		IPI00301163.1
2432.08	MYSEGSDIVPQSnETALHYFK	1		0.44584	mYSEGSDIVPQSnETALHYFK	IPI00002790.3
1072.47	TMFnSTDIK	1		0.375		IPI00783380.1;IPI00847605.1
1285.6	VGnHTAEGTGTNK;LFQnCSELFK	1		1.2021	LFQncSELFK	IPI00000001.2;IPI00218609.2;IPI00106689.3;IPI00783698.4;IPI00816013.2
2054.88	GnSSLNPCLEGSASSGSESSK;GSEGGnGSNPVAGLETDDHGGK	1		0.77373		IPI00002487.4;IPI00290826.1
2711.18	HNnDTQHIWESDSNEFSVIADPR;AGGSHQEQPPYPSYNSNYWnSTAR		1	0.6899	HNnDTQHIWESDSNEFSVIADPR	IPI00027230.3;IPI00030695.1
2111	AMnTSQVEALGIQMLPGYR		1	0.48003	AmnTSQVEALGIQmLPGYR	IPI00168262.2
1281.61	EnETVIQSAYK	1		2.0329		IPI00853133.4;IPI00935252.1
1188.5	AMSSnETAAYK	1		0.66334	AmSSnETAAYK	IPI00152377.1
1559.74	EnQSIRAFNSEHK	1	1	0.66401		IPI00004420.8;IPI00941834.1
1823.9	IDAYNEAAVSILnSSTR;VnVSVGYNCILnITTR		1	1.9903		IPI00103873.3;IPI00449306.2;IPI00719289.1
1886.95	nGSFLPNIQVFASHIDK	1		0.70403		IPI00005760.3
931.451	YHnQTLR		1	1.2097		IPI00289819.5
1226.63	VYVYALnQTR;nWTIHTWIR		1	0.1394	VYVYALnQTR	IPI00743104.2;IPI00942760.1
2259.03	ALAGLVYnASGSEHCYDIYR;DVHIPFTnGSYTFASMYHR		1	0.34988	ALAGLVYnASGSEHcYDIYR	IPI00296141.4;IPI00514161.4
3012.5	YPQDYQFYIQnFTALPLNTVVPPQR		1	0.42924	YPQDYQFYIQnFTALPLNTVVPPQR	IPI00301021.3;IPI00449669.2
1360.67	LWCAVGVnLSGGK	1		0.73046		IPI00303397.5;IPI00384432.4;IPI00479676.5;IPI00744288.1;IPI00744648.1;IPI00879552.1
2488.28	GNVISSHGNPILLnSSIPEDPSIK	1		1.409	GNVISSHGNPILLnSSIPEDPSIK	IPI00009456.1
1539.73	LNEnHSGELWKGR;SLAEQRQHEEAnK	1	1	1.5923		IPI00013219.1;IPI00028122.1
2069.84	GnSTHGCSSEETFLIDCR		1	0.94516	GnSTHGcSSEETFLIDcR	IPI00010676.1;IPI00215706.1;IPI00215707.1
2557.25	LKYEIAEVMTEIDnLTSVEESK;TYSLVLDNCINKMVNnLSSEVK	2		0.76663		IPI00013892.1;IPI00216718.5;IPI00022561.1
2161.01	TALWVATDHNMDnTSTVLR		1	0.55362	TALWVATDHNmDnTSTVLR	IPI00168262.2
1373.69	FGEFGnYSLLVK;TLFSVInNSHNK;nQTHYALQASLK	1		0.43417	FGEFGnYSLLVK	IPI00739149.3;IPI00908672.1;IPI00854642.1;IPI00854687.2;IPI00465261.2;IPI00747807.1;IPI00877711.1;IPI00878267.1
1412.72	FQLLnFSSSELK;EPALNEAnLSNLK	1		0.92488	FQLLnFSSSELK	IPI00003813.5;IPI00166392.2;IPI00479722.2
2083.1	TnITLVCKPGDLESAPVLR	1	1	0.98473	TnITLVcKPGDLESAPVLR	IPI00289819.5
1136.57	nLTQYEQLK	1		0.33869		IPI00328309.2
1824.87	YELSLHPnLTSMTFR;AWSWAWPTnHTGALAR		1	1.2054		IPI00221240.3;IPI00221241.3;IPI00307017.2;IPI00293723.2
1406.7	GLnLTEDTYKPR;ADSLRFLnASANK;SQSDTAVnVTTRK	1	1	0.97427	GLnLTEDTYKPR	IPI00023673.1;IPI00297617.5;IPI00549512.6
1347.68	ALGFEnATQALGR		1	1.5159	ALGFEnATQALGR	IPI00023673.1
992.459	nGTSDPFVR;QVVEnMTR		1	0.45815		IPI00012059.7;IPI00735483.4;IPI00293088.7
1287.67	HnSSGSILFLGR;ELLSGIGnISER		1	1.2841		IPI00027444.1;IPI00783034.5;IPI00869161.6
1266.65	YTVVAGGnVSTAK;TPQnQTIHLSK	1		1.4904		IPI00023283.3;IPI00179357.2;IPI00375498.3;IPI00759542.1;IPI00759613.4;IPI00759637.1;IPI00759754.1;IPI00939967.1;IPI00291108.6
2048.93	NNPHCGLSVQEIYnFTR		1	1.3929		IPI00394810.1
1663.78	nVSCSVnNTLLGQEK;AAAFEEQEnETVVVK	1		0.4214		IPI00013576.2;IPI00550454.1;IPI00298994.6
2337.97	DAGVGFPEYQEEDnSTYNFR		1	1.3096	DAGVGFPEYQEEDnSTYNFR	IPI00289819.5
2603.29	NYVHFAATQVQNRIKEVnETNK;InTTADEKDPTNPFRFPNIGVEK;AFIQSSnLTEHMRIHTGEKPYK	2	1	0.83844	InTTADEKDPTNPFRFPNIGVEK	IPI00010252.4;IPI00221114.2;IPI00013897.1;IPI00168690.6
2139.94	SSFLQVFnNSPDESSYYR;SDAVSHTGnYTCEVTELTR		1	5.5688	SDAVSHTGnYTcEVTELTR	IPI00017375.2;IPI00216514.6;IPI00216516.5;IPI00374740.3;IPI00872082.1
1267.59	LTDnQTSTMIK;LDnYSTQELGK	1		1.1284	LDnYSTQELGK	IPI00007736.5;IPI00030602.6;IPI00304181.4;IPI00551009.1;IPI00009456.1
687.355	LDLGnR		1	0.83343		IPI00022022.1
1126.6	GPGIKPnQTSK;KnITHTPSTK	2		1.1109	GPGIKPnQTSK	IPI00012102.1;IPI00328584.1;IPI00387123.3;IPI00552288.1;IPI00552583.2
1283.49	MnFTGGDTCHK;SEMTDNQnNSK	1		0.97131		IPI00289819.5;IPI00855998.1
788.392	TPEnLSK	1		0.41891		IPI00465253.4
2273.07	VFPYISVMVNnGSLSYDHSK;VWIMQnETGISHDAIAQESK;VADPGPASTGSnTTASDSLGGSVPK	1		0.25376	VFPYISVmVNnGSLSYDHSK	IPI00009950.1;IPI00217355.1;IPI00465287.2;IPI00465288.2;IPI00853504.1
918.484	KINQnSSK	2		0.58461		IPI00306127.1
1828.76	SASnHSEMFFADQVDK	1		0.90516		IPI00867617.6
1083.54	FTQnLSAFR;FIGATAnFSR;TFAnGSLAFR		1	0.79246		IPI00302458.1;IPI00382985.2;IPI00784761.1;IPI00647672.1;IPI00943688.1
1304.6	TPYTIEnSSHR;ILCDNADnITR;NGLCHPLnHSR		1	1.6755	ILcDNADnITR	IPI00009811.1;IPI00016112.6;IPI00829741.2
1892.82	EHEGAIYPDnTTDFQR		1	0.040125	EHEGAIYPDnTTDFQR	IPI00017601.1
1171.62	QDSLVINLnR;nNTIVNELVR;VLNnITNDLR		1	0.49401		IPI00026970.4;IPI00293088.7;IPI00012740.1;IPI00071002.1;IPI00939301.1
836.464	nTTIFLK	1		2.3357		IPI00106689.3;IPI00783698.4
1534.68	LTPAEEEnNSFQR;nHSCSEGQISIFR		1	1.2854		IPI00646857.3;IPI00027235.1;IPI00162735.3;IPI00939169.1
1343.66	WLLGMKNnHSK	2		0.40566		IPI00240812.6;IPI00845446.3
1172.57	YVQnGTYTVK;TIFPHTAGSnK;APVnGTEQTQK	1		1.3833	YVQnGTYTVK	IPI00028931.2;IPI00179326.7;IPI00216219.3;IPI00335824.5
1456.75	LnGTDPIVAADSKR;SnVTAVHKANIMR	1	1	0.20854	LnGTDPIVAADSKR	IPI00020557.2;IPI00030702.1;IPI00792971.2
948.492	IGPFAnTTK	1		3.5871		IPI00398020.7
2179.05	YPGIFnSTTSDAFLQSKMR;SGPKnMTFDLPSDATVVLnR	1	1	0.76066	SGPKnmTFDLPSDATVVLnR	IPI00294455.2;IPI00884105.2
2911.31	GQFESVAPSQnFSDSSESDTHPFVIAK	1		0.18066	GQFESVAPSQnFSDSSESDTHPFVIAK	IPI00009802.1;IPI00215628.1;IPI00215631.1
1897.93	LnLSCIHSPVVNELMR		1	0.58893		IPI00006379.1
1414.67	VTPACnTSLPAQR		1	2.064	VTPAcnTSLPAQR	IPI00005707.7
1174.61	IVDVnLTSEGK	1		0.42949	IVDVnLTSEGK	IPI00030847.3
1238.58	QSnSSSGLHPPK;QPGFASnFSVGK	1		3.0551		IPI00294728.2;IPI00478741.2;IPI01010775.1
1720.82	nHTYQMLTLLAEDR;VIEEFYnQTWVHR		1	0.15873	VIEEFYnQTWVHR	IPI00149375.3;IPI00798104.2;IPI00220194.6
2158.96	LNGPGEnVSEDEAQSSNQRK	1	1	0.69217		IPI00383949.2;IPI00855953.1;IPI00856120.1;IPI00940348.1
2842.2	DLDEVKSSLVnESEnQSSSSDSEAER	1	1	4.0718		IPI00010396.1
954.514	HLnGTITAK;nSSGLIVHK	1		0.57634	HLnGTITAK	IPI00152540.3;IPI00788676.1;IPI00795327.3;IPI00795801.1;IPI00955961.1
2113	HLYTTTGGETDFTnVTSLR		1	0.85311	HLYTTTGGETDFTnVTSLR	IPI00217882.3
1201.63	IKLLnNSDER;KVEVLENTnR	1	1	0.94409		IPI00302917.5;IPI00328828.5;IPI00647132.2;IPI00647647.2;IPI00375520.5;IPI00847963.2
4026.93	ILTnNSQTPILSPQEVVSCSQYAQGCEGGFPYLIAGK	1		0.22875		IPI00022810.2
2446.19	HYVYIInVTWSDSTSQTIYR		1	7.7575		IPI00400923.8;IPI00640092.2
776.392	DnSSLLK;EnSSLVK;DnVSLTK	1		0.3497		IPI00103873.3;IPI00291674.4;IPI00396652.3;IPI00479143.3;IPI00973279.1
1310.69	FnHTLAEPILR		1	1.3691		IPI00220289.8
2019.86	GnVSACANSVFIFDEMDK	1		0.38462		IPI00023137.1
1286.68	AVLVNnITTGER		1	2.3836	AVLVNnITTGER	IPI00759659.1
1933.94	LRMIVSSTSAnCSHQVK	1	1	0.72438		IPI00293073.4;IPI00412274.1
1051.63	VnLSAPLLPK	1		0.89314		IPI00302966.5
1410.66	QNNGAFnETLFR;TQDEILFSnSTR		1	1.1958		IPI00022462.2;IPI00152540.3;IPI00795327.3;IPI00795801.1
1458.69	FVnSTGYLTEAEK	1		0.72613	FVnSTGYLTEAEK	IPI00301144.7;IPI00332413.4;IPI01009479.1
2310.08	SGHTTNGIYTLTFPnSTEEIK	1		1.566		IPI00005128.1;IPI00181100.2;IPI00793960.1
1049.51	GLSPGnYSVR;FVEGTNInR		1	0.45273		IPI00025803.3;IPI00220325.4;IPI00171768.5
2054.97	GPDLSnCTSHWVNQLAQK;TMVFPVMYLnESVHIDK;LTQIETGEnVTGMELEFK;LnGSALNNEFFTSAAQGWK	1		0.31352	TmVFPVmYLnESVHIDK	IPI00017562.1;IPI00164345.1;IPI00410232.3;IPI00410234.1;IPI00217766.3;IPI00219860.3;IPI00852829.1;IPI00954886.1;IPI00384569.2;IPI00419431.5
1750.88	DYYPInESLASLPLR		1	0.66253	DYYPInESLASLPLR	IPI00107357.7;IPI00396411.4
1888.87	GTENGVnGTLTSNVADSPR;LEnLSSSEMGYTATLTR		1	0.87347	LEnLSSSEmGYTATLTR	IPI00219111.7;IPI00293088.7
1074.52	IIEDQnQSK;nTSPnVSVQK;nATLVNEADK	1		0.81188		IPI00003515.2;IPI00217002.6;IPI00221224.6
2132.1	IDGGPVILLQAGTPHnLTCR		1	0.95297		IPI00470360.1;IPI00470361.1
1794.84	KCATVTEnATGDLATSR	1	1	1.3502		IPI00011662.1
2024.95	QCGKAFnSSSYLQLHER;SSCGKEnTSDPSLVIAFGR	1	1	1.0668	SScGKEnTSDPSLVIAFGR	IPI00012282.2;IPI00884105.2
767.345	YDnISR;YDnLSR;LnDSYR		1	4.1477		IPI00045922.4;IPI00375872.2;IPI00843770.1;IPI00182118.1;IPI00216546.3;IPI00328272.2;IPI00385426.1;IPI00515005.4;IPI00843765.1;IPI00844215.1;IPI00871535.1
1847.78	GFTDSPHYSDHLnDSR;EETLLYDSnTSSMADR		1	0.49557		IPI00012966.1;IPI00384333.2;IPI00221240.3;IPI00221241.3;IPI00307017.2
1697.86	YKGLnLTEDTYKPR;MLVYKSEDIKnVSR	2	1	0.65388	YKGLnLTEDTYKPR	IPI00023673.1;IPI00029606.1;IPI00288894.1
1327.64	DGGnVTVSLFYR;QWRSHALnTSQ;nSSHEEAITALR;AEnQSTTLPGPGR		1	0.58484		IPI00011500.2;IPI00289055.4;IPI00019452.5;IPI00395997.7;IPI00221128.6;IPI00304064.8;IPI00377229.6;IPI00607548.4;IPI00873708.2;IPI00401789.2;IPI00646961.2
2079.88	VMSWWDYGYQIAGMAnR		1	1.1488		IPI00152377.1
1354.68	NnFSPLHLAVDK;InYTVPQSGTFK	1		0.50452	InYTVPQSGTFK	IPI00064238.2;IPI00152540.3;IPI00788676.1;IPI00795327.3;IPI00795801.1
1411.69	SRnSTVEYTLNK;HRnSSSESAIVPK	1	1	0.9927		IPI00022608.2;IPI00783859.2;IPI00924608.1
1523.65	HCGKAFnCSSSLR	1	1	1.6179		IPI00167903.7;IPI00402144.4
1326.61	LNEnHSGELWK;EASQnITYICK;nESLETYPVMK	1		0.62185	EASQnITYIcK	IPI00013219.1;IPI00739099.2;IPI00747849.2;IPI00871221.1
1725.73	NADnNSSAFTALSEER		1	0.81392		IPI00004671.2
2079.02	NKANIQFGDnGTTISAVSNK	2		0.39798	NKANIQFGDnGTTISAVSNK	IPI00217766.3
1469.72	GRDIYTFDGALnK	1	1	2.8024	GRDIYTFDGALnK	IPI00216514.6;IPI00216516.5;IPI00374740.3;IPI00872082.1
1768.78	FSCNTCPYVHnITR		1	0.93045		IPI00008461.2
2069.04	GQTALGFLYASGLGVnSSQAK;GnTTYLWEFLLDLLQDK	1		0.23338	GQTALGFLYASGLGVnSSQAK	IPI00002790.3;IPI00555723.1;IPI00009995.2;IPI00396265.1;IPI00439925.2;IPI00607557.1;IPI00607896.1
1285.61	ENRNLDnVSPK	1	1	1.1142		IPI00020368.1;IPI00184874.7;IPI00334613.1;IPI00477012.1
1608.74	LEGMnETVSnLTQR;LVAnESVPFETSCR;QFnESSYLISHQR		1	1.2089	LVAnESVPFETScR	IPI00006130.3;IPI00219456.5;IPI00328950.1;IPI00479623.2;IPI00377201.1;IPI00377202.1
1356.56	SDSSDSRTLnTSS		1	0.39512		IPI00009727.1
1893.96	TASnLTVSVLEAEGVFEK	1		0.99074	TASnLTVSVLEAEGVFEK	IPI00152540.3;IPI00788676.1;IPI00795327.3;IPI00795801.1
2157.98	VHESInSSNPMNQRGETNK	1	1	1.0322		IPI00173449.1;IPI00917217.1
2188.95	LRNPCTSEQnCTSPFSYK	1	1	1.4019	LRNPcTSEQncTSPFSYK	IPI00217561.2;IPI00217562.5;IPI00217563.4;IPI00293305.4;IPI00549336.2
961.471	KDVnETQK;DVnETQKK	2		1.3162		IPI00296365.4;IPI00619925.2;IPI00868715.1
2102.08	LQQDVLQFQKnQTNLER	1	1	1.1033	LQQDVLQFQKnQTNLER	IPI00171411.4;IPI00759659.1
1625.66	CnDTVPEDFEPFR		1	1.8025		IPI00329535.2
1097.5	WQMnFTVR;LQnETSYSR		1	1.1987		IPI00009030.1;IPI00739827.1;IPI00411753.1
1508.77	VVLGAnGTYSCLVR		1	3.705		IPI00019275.3;IPI00410488.2;IPI00441094.1;IPI00719044.1
2098.03	TTLVDnNTWnNSHIALVGK	1		0.63047	TTLVDnnTWnnSHIALVGK	IPI00152377.1
2689.37	EKVEnGSETGPLPPELQPLLEGEVK	2		1.8561	EKVEnGSETGPLPPELQPLLEGEVK	IPI00305698.2
1797.94	LYGLTMNPLIYnITR;VGSTnVSTLVNVHFAPR		1	1.1067		IPI00008632.2;IPI00470360.1;IPI00470361.1;IPI00470362.1
2881.19	GYYnQSEAGSHTIQIMYGCDVGSDGR		1	1.3618	GYYnQSEAGSHTIQImYGcDVGSDGR	IPI00647634.1
1105.49	QLnTSDENGK	1		0.62965		IPI00304895.7
1897.93	LnLSCIHSPVVNELMR;EYEIPSnLTPADVFFR		1	0.53991		IPI00006379.1;IPI00291200.2
1843.03	ATVFAnGSLLLTQVRPR		2	2.8365	ATVFAnGSLLLTQVRPR	IPI00168813.1;IPI00170814.1;IPI00174794.1;IPI00298292.4;IPI00478565.2
2381.15	YHYnASLLDGTLLDSTWNLGK	1		0.30469	YHYnASLLDGTLLDSTWNLGK	IPI00182126.3
1604.7	TAEEFLQQMnYSK	1		0.327		IPI00002606.5;IPI00044745.2;IPI00879729.1
1234.66	TnMSLGLILTR		1	1.1913		IPI00013744.1
2306.05	FLnDSIVDPVDSEWFGFYR		1	1.1543	FLnDSIVDPVDSEWFGFYR	IPI00002412.1
1711.77	LFLECLNnDTEESK;VSVTTnTTDSVSDEEK	1		0.73335		IPI00411596.4;IPI00470597.5;IPI00939720.2
803.403	LSVENnK;nVSVAEGK;AEnASLAK;nSSPALKS	1		0.78253		IPI00002970.1;IPI00022048.8;IPI00043201.2;IPI00847137.1
1599.78	IFNIDSGnGSIFTSK;AMELVTInYSSDLK	1		1.5669		IPI00024035.1;IPI00217314.1;IPI00513919.8;IPI00829672.1;IPI00954802.2
822.372	MnVTWR		1	0.25024		IPI00465322.3;IPI00747930.1
2204.95	WLNSGRGDEASEEGQnGSSPK;MEQSnDSLRVNHNDGEESK	1	1	1.8944		IPI00019901.1;IPI00220158.1;IPI00253279.2;IPI00295701.2
1336.61	DNnGTALLEFDK	1		0.7697		IPI00032262.1
1429.6	FGTCSQLCnNTK;nESSPAPPDSDADK	1		0.43624		IPI00020557.2;IPI00328183.2;IPI00867503.1
1686.89	TALFPDLLAQGnASLR;SSISALnSSQLEPVVR		1	1.2994	TALFPDLLAQGnASLR	IPI00019275.3;IPI00410488.2;IPI00441094.1;IPI00719044.1;IPI00183572.4;IPI00513791.2;IPI00807434.2;IPI00815633.1;IPI00815886.1;IPI00816106.3
2530.1	MDKSDAVSHTGnYTCEVTELTR	1	1	1.704	mDKSDAVSHTGnYTcEVTELTR	IPI00216514.6;IPI00216516.5;IPI00374740.3;IPI00872082.1
1058.49	TnKSTGGEHK	2		1.8166		IPI00220109.7;IPI00297633.7;IPI00845355.2;IPI00883721.3;IPI00938010.2;IPI00940810.2
1422.67	NLLEEEWnFTK;HPnYSPPGSPIEK;nVTCQATSVVSEK	1		0.47927		IPI00186536.9;IPI00386260.7;IPI00296078.5;IPI00853099.1;IPI00937887.1;IPI00794779.2;IPI01012356.1
1693.79	ESLMnQSRWNSGLR;AnESRLEEADQLYR		2	2.2649	AnESRLEEADQLYR	IPI00171117.5;IPI00470924.2;IPI00829865.1
1809.82	nKSMSQAETEGAKQER	2	1	0.5564		IPI00005631.3
1274.67	EVIDTnLTTLR		1	3.6116	EVIDTnLTTLR	IPI00377045.4;IPI00790908.1
1330.67	EGSLPGnSTISIR		1	3.4844	EGSLPGnSTISIR	IPI00377045.4;IPI00790908.1
1565.76	YEQAKnISQDLEK;AFLnDSQASKYPPK	2		0.33665	YEQAKnISQDLEK	IPI00298281.4;IPI00748916.2
1323.68	LnESTTFVLGSR		1	0.92814		IPI00057097.3
988.595	KIYIPLnK	2		0.46791	KIYIPLnK	IPI00021983.1;IPI00375688.1
1617.79	ANGGGALVEnTTTGISR;EQSLnVSQDLDTIR;LGFLGnQSQGCLPAR		1	0.70843	LGFLGnQSQGcLPAR	IPI00100933.1;IPI00903152.1;IPI00239405.4;IPI00239406.2;IPI00239413.4;IPI00329535.2
3752.7	LGNTISSLFGGGTTPDAKEnGTDTVQEEEESPAEGSK;SFEGGVnDSTCLLCDDCPGDINALPELKHYDLK;TPLHYFDSQCMAAMNFQTMHnVTTETKFLLK	2		0.32125	LGNTISSLFGGGTTPDAKEnGTDTVQEEEESPAEGSK	IPI00000877.1;IPI00375505.3;IPI00746651.6;IPI00761101.2;IPI00793901.2
1540.71	IDDQRGnLSGNSHK	1	1	0.60001		IPI00165995.6
1072.59	LKAInDTAAR;AEnASLAKLR	1	1	1.6234	LKAInDTAAR	IPI00025846.3;IPI00220146.1;IPI00043201.2
1432.71	DTGELnVTSILDR		1	0.48795		IPI00028931.2
1168.55	AFSWSSnLTR		1	0.037947		IPI00064064.1
2728.32	TDDEVVQREEEAIQLDGLnASQIR		2	0.17049	TDDEVVQREEEAIQLDGLnASQIR	IPI00027230.3
1146.55	LFPnTSDPQK	1		0.57867		IPI00103231.8;IPI00429324.3
2338.1	MHIFQnGSLVIHDVAPEDSGR;LCTIVESFNSPnVTIDPEFR		1	0.56618	mHIFQnGSLVIHDVAPEDSGR	IPI00168813.1;IPI00170814.1;IPI00174794.1;IPI00298292.4;IPI00925578.1
2530.15	NPWPSnLTLVSTnGSSGCGRCHK;MDPPCTnTTAASTYLNNPYVRK;TEKEPLSDPVGTCYLSTDnFTR	1	1	2.1354	TEKEPLSDPVGTcYLSTDnFTR	IPI00016371.1;IPI00215722.1;IPI00816395.1;IPI00969544.1;IPI00021794.8;IPI00306604.5
1434.74	DITDLInNTFIR		1	0.62264	DITDLInnTFIR	IPI00217882.3
2083.97	GQFFPSEDLQEQIYLnR;AYLLPAPPAPGnASESEEDR		1	0.96935	AYLLPAPPAPGnASESEEDR	IPI00003384.1;IPI00874160.2;IPI00018305.4
1625.71	SQTPnNTVTYESER		1	0.94658		IPI00060628.3
2334.02	HLnSTDDADRIPFQEDWMK	1	1	0.64302		IPI00032138.4;IPI00218348.3;IPI00218349.2
938.47	GInESYKK;KIGEnYSK	2		0.96504		IPI00002412.1;IPI00853256.1
2996.21	NLGGLETEDDYSYQGHMQSCnFSAEK	1		0.81829		IPI00002816.1
1863.94	GEEIVQQLIEnSTTFR;MPSTTAISSnISSPVTVR		1	2.4827		IPI00099311.3;IPI00155747.4;IPI00885131.1;IPI00395342.3;IPI00784155.1
812.349	YnCSIR		1	1.6184		IPI00943008.1
1611.85	AnTTQPGIVEGGQVLK;LPVDVVVnASNEDLK	1		0.88837	AnTTQPGIVEGGQVLK	IPI00027505.2;IPI00555991.2;IPI00291215.6;IPI00783216.1;IPI00783683.2;IPI00783883.1
1652.81	nLTTNQFLMQEVAK	1		0.37853		IPI00394751.2
1394.64	YHGFLnTSYHR;GAAnDSTQFTVAGR		1	0.17584	YHGFLnTSYHR	IPI00003807.7;IPI00018370.4;IPI00412650.2
2217.05	AQEALSMGnATFYEVESILK;SAENTILPEEETVVQnTSAGK	1		1.9532	AQEALSmGnATFYEVESILK	IPI00015117.2;IPI00220572.2;IPI00299554.3
1471.63	DVMQVAnTTMSSR;AVTGENnFTDTMR;EEEnGTNTADHVR		1	0.60104		IPI00027232.3;IPI00181821.3;IPI00607566.1;IPI00607686.1;IPI00607859.1;IPI00456722.3;IPI00456723.1;IPI00472044.4;IPI00646904.3;IPI00744251.2;IPI00783865.2
862.392	nGSVPTCK	1		0.54121		IPI00376344.3;IPI00414980.2
2443.1	FTFTSHTPGDHQICLHSnSTR;HAnSSTGQPCVENEnLTDLISR;WHFnETVLTVWSAPNYCYR		1	0.28102	FTFTSHTPGDHQIcLHSnSTR	IPI00296259.4;IPI00914891.1;IPI00914908.1;IPI00445335.2;IPI00844013.1;IPI01012571.1;IPI00012833.1
1894.81	KDTCTQECSYFnITK	2		1.5214	KDTcTQEcSYFnITK	IPI00217561.2;IPI00217562.5;IPI00217563.4;IPI00293305.4;IPI00549336.2
2199.03	SPGPGPDLYSAPIFSSnYSSR;nCSAAPQPEPAAGLASYPELR		1	0.89252	ncSAAPQPEPAAGLASYPELR	IPI00168641.8;IPI00761097.3;IPI00748502.2
3105.52	TLTnQTEAELATPEGIYERPVDYLPER		2	0.58139	TLTnQTEAELATPEGIYERPVDYLPER	IPI00003128.1;IPI00182373.2
1748.81	SQESQLPEESKSASnK	2		0.43646		IPI00465087.2
1217.62	VVAEnITQTSR;HFnTSLVFPR;AVEnSSTAIGIR;SGLAGTInLSER		1	0.94846		IPI00009802.1;IPI00215628.1;IPI00215631.1;IPI00074799.5;IPI00478749.2;IPI00171199.5;IPI00419249.5;IPI00294728.2
1415.66	WGHnITEFQQR		1	1.0545	WGHnITEFQQR	IPI00386755.2
1376.68	VSLTnVSISDEGR		1	1.6306	VSLTnVSISDEGR	IPI00003813.5;IPI00166392.2
1923.99	YQPInSTHELGPLVDLK	1		0.4532		IPI00333776.6;IPI00333777.6;IPI00333778.6;IPI00415032.2;IPI00873446.2
1066.51	nNTITTTSSK;YIHQnYTK	1		1.2371	YIHQnYTK	IPI00783186.2;IPI00784020.1;IPI00943008.1
1075.56	nVTLILDCK	1		0.34186		IPI00844090.1
3593.74	VIDGMTVVHSIELQATDGHDRPLTnCSIINSGK	1	1	0.88525	VIDGmTVVHSIELQATDGHDRPLTncSIINSGK	IPI00024129.1
1326.66	IYLRnESEFR		2	1.2022		IPI00306604.5
1414.69	VTPACnTSLPAQR;nSTEALTEVPPTR		1	0.9484	VTPAcnTSLPAQR	IPI00005707.7;IPI00060628.3
1815.84	ALSQQnVSMDLATFMK;EYNLnFSGSSTIQEVK	1		0.79579	ALSQQnVSmDLATFmK	IPI00025110.5;IPI00793522.1;IPI00793649.1;IPI00798210.1;IPI00070643.6
2204.12	AEnQTAPGEVPALSNLRPPSR;LSSDTALLGRSVTEnLSDGLR		2	0.94721		IPI00002802.1;IPI00015826.2
767.321	FPnMSR		1	0.98467		IPI00219793.1;IPI00329590.4
732.329	nASSPEK	1		0.3347		IPI00008477.1
3685.64	VRTSTGFRATDFFGGILMnNTTDVEMAAIDCDK;ASLLHSMPTHSSPRSRDYNPYnYSDSISPFnK	1	2	8.1139		IPI00218288.6;IPI00747830.2;IPI00945554.2
3753.69	YPVKPEEMDWSELYPEFFAPLTQnQSHDDPK	2		0.32092		IPI00290184.4
1342.61	LSDTAnYTCVAK	1		0.52019		IPI00293757.4;IPI00470749.2
1729.78	DGTPLSDGQSnHTVSSK;FFGDHTSnLSIFGCK	1		1.0666	DGTPLSDGQSnHTVSSK	IPI00168813.1;IPI00170814.1;IPI00174794.1;IPI00298292.4;IPI00478565.2;IPI00152264.5
1300.65	IVGnGSEQQLQK;LnGTDPIVAADSK	1		0.10354		IPI00016702.4;IPI00386898.9;IPI00855799.1;IPI00020557.2
1849.87	SLYVnMTSGPGGPAAAAGGR		1	0.73212		IPI00100239.1;IPI00396595.2
2677.26	FAEInGSALCSYNLKPSEYTTSPK	2		1.4673	FAEInGSALcSYNLKPSEYTTSPK	IPI00005068.2;IPI00221393.1;IPI00642657.1
649.267	nESGSR		1	2.3125		IPI00029472.2;IPI00218377.1
1444.78	nSTKQEILAALEK;AKAVALDSDnISLK;nLTLKIEQETQK	2		0.60578	nSTKQEILAALEK	IPI00012503.1;IPI00219825.2;IPI00744835.1;IPI00171636.3;IPI00550839.1;IPI00641075.6;IPI00641137.2;IPI00845310.1;IPI00845401.1;IPI00845471.1;IPI00307155.8
1238.63	VnITYNYPVR;EQInITLDHR		1	2.4603	EQInITLDHR	IPI00092641.1;IPI00943008.1
2854.31	TVNSLnVSAISIPEHDEADEISDENR		1	0.78252	TVnSLnVSAISIPEHDEADEISDENR	IPI00015102.2
1221.53	AFESDVFHnR;DEGLCSAnVTR;DAGVVCTnETR		1	5.4286		IPI00009146.4;IPI00009198.3;IPI00023673.1
1674.87	LRPDDSKnFSIQVR	1	2	0.752		IPI00220350.2;IPI00220351.2;IPI00303283.2
2243.99	YHYnGTFLDGTLFDSSHNR		1	3.2602	YHYnGTFLDGTLFDSSHNR	IPI00182126.3
1563.79	YYKGSLSYLnVTR;nVSQAIHKYNAYR	1	1	4.102	YYKGSLSYLnVTR	IPI00011229.1;IPI00219538.3
1987.99	IRInTTADEKDPTNPFR	1	2	4.5168		IPI00013897.1
1185.6	LVGYITnYSR;SYnVTSVLFR;LFnLTSTFSR		1	0.63217		IPI00103047.1;IPI00299547.4;IPI01013763.1;IPI00217759.2;IPI00647266.1
1956	RQQAnESLESLIPDSLR;RAnTSALAVPSPVSNSASAR		2	1.5729		IPI00009727.1;IPI00296922.4
1508.62	TACnMTYGSFGGVK	1		1.562		IPI00166804.3;IPI00477766.3;IPI00479833.2;IPI00651741.1;IPI00658164.1;IPI00748340.1
1215.62	AQAALDKAnASR	1	1	0.34203	AQAALDKAnASR	IPI00296922.4
1494.6	VSDnESSSnYTYK	1		2.7786	VSDnESSSnYTYK	IPI00290328.3
2123.11	nSSLTVHQRIHTGEKPYR;KQELSRDnATLQATLHAAR	1	2	0.6933	KQELSRDnATLQATLHAAR	IPI00021547.2;IPI00783665.5
1339.61	LLMnDSVSSETK;LSDTTSQSnSTAK	1		1.2884	LSDTTSQSnSTAK	IPI00010213.3;IPI00013976.4
1133.56	GLCVnASAVSR		1	2.4181		IPI00018305.4
793.397	SFIGQnK	1		1.0931		IPI00465429.3;IPI00556586.2;IPI00744637.2
1428.76	LnASIADLQSQLR		1	3.9978	LnASIADLQSQLR	IPI00783665.5
1615.86	LQRVnNTLSSQISR		2	0.79798	LQRVnnTLSSQISR	IPI00298281.4
3636.67	AnTSQPGVLQGGAVYLCPWGASPTQCTPIEFDSK	1		0.96424		IPI00306604.5
1381.69	DnATLQATLHAAR		1	1.9445	DnATLQATLHAAR	IPI00783665.5
2797.39	TLSELMSQTGHLGLAnASAPSGEQLLR		1	1.518	TLSELmSQTGHLGLAnASAPSGEQLLR	IPI00783665.5
1840.86	nMSFVNDLTVTQDGRK	1	1	1.094		IPI00031131.4;IPI00929530.1
1390.77	NILPnITTTYLK	1		0.8793		IPI00293327.4
2913.44	GTDPSLSPSPAALPPAPGTELSYLnGTFR		1	0.48696	GTDPSLSPSPAALPPAPGTELSYLnGTFR	IPI00005707.7
1820.83	EENVVKSEEGnGSVSEK	2		0.84306		IPI00401142.5;IPI00470906.1;IPI00855887.1;IPI00856051.1
1791.89	LNLQTSTSIPnVTEMK	1		0.55649		IPI00013744.1
2033.99	NGInVTPSQRCnITTTEK;ISSLQTTEKnDTVAGQGER;EKVnATEEMLQQELLSR	1	1	0.40387	ISSLQTTEKnDTVAGQGER	IPI00023283.3;IPI00179357.2;IPI00759542.1;IPI00759613.4;IPI00759637.1;IPI00759754.1;IPI00027505.2;IPI00555991.2;IPI00179172.6;IPI00397366.4;IPI00397368.2
1302.68	TSnISKPGTLER;DLLVTNTREnK	1	1	0.87299	TSnISKPGTLER	IPI00005707.7;IPI00221067.1;IPI00304030.1;IPI00843944.1;IPI01011765.1
2650.19	GPMNQCLVATGTHEPKnQSYMVR;VEVKEEEESSSnGTASQSTSPSQPR;QMKLGLVSPESMDnYSHFHELR	1	1	1.1696		IPI00010676.1;IPI00215707.1;IPI00023339.2;IPI00292953.6;IPI00759532.1;IPI00965169.1
733.34	QnQTSR		1	0.16073		IPI00446436.1
1754.79	YAPDDIPNInSTCFK;ASPDQnASTHTPQSSVK;GnITEYQCHQYITK	1		0.44075	GnITEYQcHQYITK	IPI00023461.2;IPI00216505.1;IPI00398718.6;IPI00759546.3;IPI00953593.1;IPI01014668.1;IPI00291930.7;IPI00397519.3;IPI00414717.1;IPI00641153.3
1720.77	EEAMLYHnQTAELR		1	0.35485	EEAmLYHnQTAELR	IPI00642798.1
1385.75	VLEAVnGTDARLK;KVEAEALnATAIR	1	1	1.1692	KVEAEALnATAIR	IPI00024811.1;IPI00289831.5;IPI00332271.7;IPI00332272.3;IPI00332273.3;IPI00743517.1
1905.98	VVLNYnGTSQELVAVSGR		1	2.0036		IPI00027200.1
1140.55	NnHTASILDR		1	0.52687	NnHTASILDR	IPI00215998.5
2209	YHYnGTLLDGTLFDSSYSR;GALETDNSnSSAQVSTVGQTSR		1	0.37267	YHYnGTLLDGTLFDSSYSR	IPI00182126.3;IPI00873067.2;IPI00940033.2
1328.76	ISnLTIVQAEIK	1		0.45731		IPI00797136.2;IPI00896464.1
647.328	nVTWK;InWSK	1		0.39009		IPI00032140.4;IPI00514075.5;IPI00784002.3;IPI00795015.2;IPI00844086.1;IPI01015143.1
2329.19	VLGEVYLHTWITEnTSIPTR;TAADTTGLQPILNQFTPAnISR		1	0.65206	TAADTTGLQPILnQFTPAnISR	IPI00016725.2;IPI00027505.2;IPI00555991.2
1219.55	ENQnHSYSLK	1		0.37728	ENQnHSYSLK	IPI00027505.2;IPI00555991.2
2178.06	VDFPYQDKLVGYITnYSR;CLTDTNLFQKnSSFHPIR	1	1	0.46397		IPI00103047.1;IPI00217914.4
1653.77	NPATTnQTEFERVF;GMGALIATnTTEnSTR		1	0.83938		IPI00301923.4;IPI00552413.2;IPI00419431.5
934.444	QYPPnTSK;QVMAEVnK;YFnYTVK	1		0.47293		IPI00018873.1;IPI00293460.5;IPI00337495.3;IPI00472165.1
1296.66	WTGHnVTVVQR;LLYNnVSNFGR		1	0.081786	WTGHnVTVVQR	IPI00020557.2;IPI00024067.4;IPI00455383.4
1417.76	EGIAQTVFLGLnR;ALVnHSGLSAPVPR		1	1.6062		IPI00010706.1;IPI00794880.1
1916.94	IAWnLSWYHGSDNLLK	1		2.9264		IPI00645947.4;IPI00647076.5;IPI00869092.1
1141.47	NTnSSNnFSR		1	0.5528		IPI00396658.3;IPI00845516.1
2239.02	IQQESLGSAPLMGDDHPnASR		1	0.76997	IQQESLGSAPLmGDDHPnASR	IPI00455473.2;IPI00739902.2
1612.74	DMSDGFISnLTIQR;DWVMLSLSnFTQR		1	1.1164	DmSDGFISnLTIQR	IPI00009923.1;IPI00218682.1;IPI00002335.1
1146.57	VInETWAWK;EnISVALTDGK	1		0.86474	VInETWAWK	IPI00000877.1;IPI00337426.1
1366.68	VVnSTTGPGEHLR;AVSWInFSSLSR		1	0.025972	VVnSTTGPGEHLR	IPI00296099.6;IPI00455733.5
2173.01	EDAQInTTIGSVTAQDPDAAR		1	2.0332	EDAQInTTIGSVTAQDPDAAR	IPI00024035.1;IPI00217314.1
1671.87	LKAWEAVPSLnKTQS	2		0.25163		IPI00759533.2;IPI00759561.2
1478.8	IVELLnETEKYK	2		0.075746		IPI00019223.3;IPI00220624.2;IPI00220625.1;IPI00220627.1;IPI00220628.1
1491.66	FEnQTGFPPPDSR;nSSQFFQSYVER		1	0.031237	FEnQTGFPPPDSR	IPI00009802.1;IPI00215628.1;IPI00215629.1;IPI00215630.1;IPI00215631.1;IPI00028275.2;IPI00472887.3;IPI00921422.1
2817.37	QQEIHKSFRGSnFTVAPSVVNSDNR;WAARTFSnKTLVLDETTTSTGSAGMR;LRESLTPDGSKWSTSLMQTLGnHSR	1	2	0.39283		IPI00169307.6;IPI00867727.2;IPI00028786.5;IPI00409566.2;IPI00409567.2;IPI00150881.3;IPI00645760.2;IPI00853308.1
951.466	LMETnLSK;SAnASFNIK;ISGQnGTFK	1		1.1009	SAnASFNIK	IPI00009882.1;IPI00168813.1;IPI00170814.1;IPI00174794.1;IPI00298292.4;IPI00478565.2;IPI00329275.7;IPI00375427.2;IPI00375428.6;IPI00375429.2;IPI00893010.2
1153.6	EAInITLDHK	1		0.37428		IPI00337495.3;IPI00472165.1
1417.72	nTSEVKEDVVLGK	2		0.16093		IPI00011933.3;IPI00478736.2
1910.8	MAnNTKELEDCEQANK	2		1.2514		IPI00429633.6
1652.82	nLTTNQFLMQEVAK;LVYSnSSSGPTATLQK;ELSFVLDYInQSPK;VTAQGPGLEPSGNIAnK	1		0.038755		IPI00394751.2;IPI00456634.1;IPI00456994.4;IPI00217240.1;IPI00302592.2;IPI00333541.6
1227.57	MnISQASVSFK;MLEAYnLTEK	1		0.1455	mLEAYnLTEK	IPI00007234.1;IPI00221384.2;IPI00302944.3;IPI00329573.9
979.534	nKTLSAAFK;nLTVNYKK;nATTVKFAK;KnNTYLVK	2		0.50207	KnnTYLVK	IPI00004459.1;IPI00009634.1;IPI00298949.1;IPI00304892.2;IPI00374590.4;IPI00383014.2
2584.07	DSEAFCHAnCSGPAPAAKPDPDGGR	1	1	0.34441	DSEAFcHAncSGPAPAAKPDPDGGR	IPI00642798.1
2399.16	EDGVFnISVDNTCSLFRGLQK;ANGnRSGAPNVVVVMVDGWPTDK;GSnFSNSEVAIGLSPYTFPQKR	1	1	1.1482		IPI00029079.5;IPI00785025.1;IPI00963930.1;IPI00964774.1;IPI00015556.6
1664.92	RPPLAELAALnLSGSR		2	1.8335	RPPLAELAALnLSGSR	IPI00009111.1
1999.13	RATVFAnGSLLLTQVRPR		3	0.65535		IPI00168813.1;IPI00170814.1;IPI00174794.1;IPI00298292.4;IPI00478565.2
1900.83	MSVINFECnKTAGNDGK	2		0.62386		IPI00289819.5
1521.78	KKPnATAEPTPPDR;nMSKKTNLIVDSR;LnRSDSDSSTLAKK	2	1	0.31374	KKPnATAEPTPPDR	IPI00005707.7;IPI00060419.3;IPI00550853.2;IPI00871775.1;IPI00873117.1;IPI00873525.1;IPI00873602.1;IPI00874129.1
1651.74	TKnETDEDGWTTVR;nQTYSFSPSKSYSR	1	1	0.60072		IPI00029012.1;IPI00465142.2
2006.96	HRPTAGAFnHSDLDAELR		2	0.38345		IPI00297910.2
1819.9	IFSLLSGEGnVTFNGHK;EPnLTYEPQLPYVEK;GSTLSQWSLGnGTPVTSK	1		0.20779		IPI00009471.1;IPI00216219.3;IPI00335824.5;IPI00257903.4
1125.48	YnCSIESPR		1	0.38483	YncSIESPR	IPI00337495.3;IPI00472165.1
1580.76	EAGnITTDGYEILGK	1		0.048753	EAGnITTDGYEILGK	IPI00221384.2;IPI00329573.9
1962.88	VWnSTFIEDYRDFDR		2	2.7793	VWnSTFIEDYRDFDR	IPI00215995.1;IPI00290043.2
1214.53	FnSSSSSLEEK	1		0.56112		IPI00296197.2
1621.78	AEDRDAGAnASILYR		2	0.23191		IPI00064262.1
3857.91	AGYFnFTSATITYLAQEDGPVVIGSTSAPGQGGILAQR		1	0.69986		IPI00425902.4
402.222	InR;LnR		1	0.55189		IPI00002901.5;IPI00007249.3;IPI00010418.6;IPI00011736.4;IPI00015262.1;IPI00021145.1;IPI00021786.1;IPI00032038.4;IPI00179053.3;IPI00219831.1;IPI00479108.1;IPI00743335.3;IPI00746684.4;IPI00829992.3;IPI00900312.1;IPI00006122.6;IPI00031023.1;IPI00045864.1;IPI00105916.1;IPI00149964.6;IPI00187110.4;IPI00217340.2;IPI00218139.4;IPI00248651.4;IPI00401163.6;IPI00515009.3;IPI00550611.5;IPI00550853.2;IPI0055…
562.295	LnTSK;SnLTK;nSTLK;nITSK;nVTTK;nLSTK;TLSnK;nSTIK	1		0.84474		IPI00010486.2;IPI00216992.5;IPI00219602.1;IPI00640426.1;IPI00018213.5;IPI00168604.2;IPI00299890.1;IPI00410359.4;IPI00955961.1;IPI00026673.5;IPI00071696.2;IPI00216100.6;IPI00419894.1;IPI00472247.3;IPI00658062.1;IPI00736943.2;IPI00741668.3;IPI00742111.2;IPI00926621.1;IPI00178375.3;IPI00784254.2;IPI00218853.1;IPI00940798.1;IPI00292012.8;IPI00788065.1;IPI00439761.5;IPI00743813.3
647.287	GnDSVR;EnQTR;QnETR		1	2.0739		IPI00012181.1;IPI00030531.4;IPI00446339.2;IPI00791574.1;IPI00794566.1;IPI00302181.4;IPI00790775.1;IPI00796068.2
689.371	nVSLTR;LVnSTR;LnLSSR		1	1.8759		IPI00100453.7;IPI00514187.2;IPI00746398.1;IPI00856026.3;IPI01012937.1;IPI00304817.7;IPI00397526.3;IPI00479307.4;IPI00790503.3
739.351	nYSSLR;YVnSTR;YLnSSR		1	1.5671		IPI00007277.2;IPI00008542.3;IPI00165459.7
771.38	YYLAnK	1		0.54397		IPI00031456.2;IPI00978970.1
830.486	InLSQKK	2		1.3912		IPI00295851.4
834.373	LSNCAnR;GnVSACAR		1	2.2636		IPI00181391.9;IPI00465449.3;IPI00477231.3;IPI00413293.6
848.387	EnKSENK;nKSENEK	2		1.2499		IPI00097163.4;IPI00554824.1;IPI00296830.5;IPI00395737.3;IPI00744623.1
873.471	LKQnQSR	1	1	1.5308		IPI00105916.1
876.437	DLMVInR		1	1.0252		IPI00151358.2;IPI00186429.8
904.44	GASnLTWR;GVnLSCVR		1	2.7032		IPI00012102.1;IPI00941011.1
921.443	ISnSTSQGK	1		1.3522		IPI00014977.5
946.496	LnDTVGVTK	1		1.6582	LnDTVGVTK	IPI00377045.4;IPI00790908.1
980.48	AASnFTEIK;ELnLSYNK	1		0.29515		IPI00022608.2;IPI00657962.1;IPI00888387.1
986.481	KnSTAYFR	1	1	0.97196		IPI00301163.1
989.441	nETQVDGAR;DLQAnDTGR		1	7.7592		IPI00003384.1;IPI00334532.3;IPI00871467.2
990.486	nATQWKDK	2		1.191		IPI00011551.1;IPI00030371.2;IPI00410582.3
1005.49	LNPGnYTAR;NQIVFDnR		1	0.27136		IPI00027232.3;IPI00411623.3
1008.49	nISFERnK	1	1	0.82923		IPI00167305.6;IPI00760874.1
1036.52	EQYTIInR;EFTnLSGIR		1	1.6516		IPI00297124.2;IPI00939624.1;IPI00398007.1;IPI00947085.1
1047.52	SEDIKnVSR	1	1	3.5672		IPI00029606.1;IPI00288894.1
1060.5	VnVTVEDER		1	14.788	VnVTVEDER	IPI00010338.1
1061.54	GTAnLSETIR;ISAATnLSER		1	0.39994	GTAnLSETIR	IPI00656087.2;IPI00848309.2;IPI01008905.1;IPI00871270.2
1066.51	TFnNTSNLR		1	3.3176		IPI00301583.3;IPI00395807.4
1074.56	IKEVnETNK;LNKEnDTLK;LIDNnKTEK	2		2.5783	LIDnnKTEK	IPI00010252.4;IPI00221114.2;IPI00011074.2;IPI00456615.2;IPI00012503.1;IPI00219825.2;IPI00744835.1
1077.48	YFYNnQTK;nASVETVDnK	1		3.7784		IPI00021834.1;IPI00218184.1;IPI00304918.2
1091.49	LEnWTDASR		1	0.6089		IPI00022048.8
1093.5	AQYEEIAnR;TNSnASTVSGR;DFnETQLAR;SWnETLTSR		1	0.2186		IPI00009867.3;IPI00012856.1;IPI00030431.1;IPI00071177.1;IPI00219619.1;IPI00871735.1;IPI00220487.4;IPI00456049.3
1119.59	TYnASVLPVR		1	2.5402	TYnASVLPVR	IPI00465308.3;IPI00554703.1
1126.57	LLQHLnCTK	1		2.1162		IPI00216197.1;IPI00290791.1;IPI00334756.4;IPI00433086.1;IPI00433087.2;IPI00868860.2
1130.62	NLKSLLnNSK	2		1.6083		IPI00171134.5;IPI00654603.4;IPI00893288.3;IPI00943263.1
1216.58	VFHGnESLWK	1		0.93494		IPI00218235.5
1234.55	ECLAnGSWAAR;nNSNFGPEVTR		1	1.3289		IPI00003083.2;IPI00219267.1;IPI00219268.1;IPI00219269.1;IPI00016922.2;IPI00902667.1
1234.58	SnVSDAVAQSTR;ELAVPDGYTnR		1	6.7806	ELAVPDGYTnR	IPI00797270.4;IPI00215995.1;IPI00290043.2
1234.6	MVLWnDSVVR		1	1.5443		IPI00000425.2
1235.49	FMFMEEGAnK	1		1.1909		IPI00002884.4;IPI00217869.5
1241.53	YHSQTYGnGSK	1		0.86454		IPI00329760.8;IPI00398855.1;IPI00873981.2
1241.6	FINYnQTVSR		1	2.3566	FINYnQTVSR	IPI00642244.2;IPI00642584.2;IPI00645487.2;IPI00784543.1
1244.57	LTFYGnWSEK	1		0.76815		IPI00171473.2
1264.72	AnHSGAVVLLKR	1	1	4.0588		IPI00010697.2;IPI00216221.2;IPI00216222.2;IPI00216223.3;IPI00216224.2;IPI00216225.2;IPI00921080.1;IPI00921401.1
1268.6	EIATSnSSANFK	1		0.10313		IPI00168428.4
1308.68	LLTQGFTnWTK	1		0.40891		IPI00216046.3;IPI00646130.2
1315.7	NAIKEGDnITLK	2		6.1009	nAIKEGDnITLK	IPI00015102.2;IPI00807403.1
1321.65	DVnYTQIVVDR;VTLELSnGSMVR		1	1.1483		IPI00023807.3;IPI00915390.1;IPI00033907.1
1355.68	FFPYAnGTLGIR		1	0.10878		IPI00334532.3;IPI00871467.2
1395.61	DQELIEnESYR		1	2.6519		IPI00146077.4;IPI00166997.2;IPI00423392.5
1451.7	LnCSTSPEIFRK	1	1	2.702		IPI00414661.7
1465.7	LDSADAnFSVWIK;IGPMNnITSDIFK;IDVNSWIEnFTK	1		2.0939		IPI00791573.1;IPI00844490.2;IPI00953206.1;IPI00953262.1;IPI00953650.1;IPI00978064.1;IPI01015859.1
1481.73	IEVLHRPEnCSK	1	1	0.046941	IEVLHRPEncSK	IPI00001914.1;IPI00218686.3;IPI01009357.1
1485.78	QLEIAnNSSQILR;NNQLALTLIDTnR;EAGNInQSLLTLGR		1	29.788	NNQLALTLIDTnR	IPI00066817.7;IPI00296605.4;IPI00307430.5;IPI00300384.3;IPI00845478.2;IPI00964086.2;IPI00305289.2
1495.67	NVDMAGFIANnGTR;QQIANELnYSCR		1	0.68087		IPI00003384.1;IPI00029175.5
1507.74	TFAnSSYLAQHIR;AVGnSTFAIACLQR;VLnVTNLEFSDTR		1	2.118		IPI00152875.3;IPI00220697.5;IPI00385446.2;IPI00302966.5;IPI00867617.6
1508.77	IKLDnYSTQELGK;NnATVKGVNFYGPK	2		1.6722	IKLDnYSTQELGK	IPI00009456.1;IPI00290071.4
1516.71	LWnSTFLEEYSK	1		2.2105	LWnSTFLEEYSK	IPI00010697.2;IPI00216221.2;IPI00216222.2;IPI00216223.3;IPI00216224.2;IPI00216225.2;IPI00921080.1;IPI00921401.1
1521.78	KKPnATAEPTPPDR;nMSKKTNLIVDSR	2	1	0.27766	KKPnATAEPTPPDR	IPI00005707.7;IPI00060419.3
1538.65	RFGESDTENQNnK	1	1	0.69214		IPI00328149.3;IPI00328150.1
1555.77	SAnSTLAQALHWTR;VFGELAILYnCTR		1	1.5799		IPI00385495.5;IPI00852693.1;IPI00854764.3;IPI00427586.4;IPI00436355.1
1556.76	nHSIFLADINQER		1	0.42457	nHSIFLADINQER	IPI00002412.1
1559.77	IVnLTENAGYYFR		1	0.80692		IPI00023283.3;IPI00179357.2;IPI00375498.3;IPI00759542.1;IPI00759613.4;IPI00759637.1;IPI00759754.1
1561.76	QGQDnLSSVKETQK	2		1.1048		IPI00024911.1
1561.8	ILnQTADMLQLASK;NLIESMQInGSVLK	1		0.14521	ILnQTADmLQLASK	IPI00007800.1;IPI00025273.1
1596.73	ADETnTTSRSSAQTK	1	1	2.5574		IPI00217264.6;IPI00786887.3;IPI00847637.1
1608.78	VHAGnFSTIPQYFK	1		0.3464		IPI00006121.1;IPI00013771.1;IPI00026104.1
1618.82	nESLAQYNPKLDVK;MNNIDGKELLnLTK;DAKAQLALSSSAnQSK;NAMLIKGGNAnATVTK;DGGSPPLnSTKSFAIK	2		0.69052		IPI00021448.2;IPI00295788.1;IPI00333040.5;IPI00807573.1;IPI00167822.4;IPI00477952.5;IPI00329028.2;IPI00396329.1;IPI00645206.2;IPI00844435.1
1623.74	AERTCSLNnCTVAK	1	1	0.032872		IPI00010369.2
1646.87	LLPAFnTTSGLPYPR		1	1.3423	LLPAFnTTSGLPYPR	IPI00009410.2
1649.79	nETIWYLKYHWP;nITQLSYQSHMALK	1		0.98499		IPI00217058.3;IPI00244111.1;IPI00478376.3;IPI00553072.4;IPI00604769.2
1652.67	DGTFnYSPDVYCSK;NTNENPQECFnASK;NnNSQQDIDSENMK	1		1.234	NTNENPQEcFnASK	IPI00045532.1;IPI00061757.3;IPI00969183.1;IPI00298702.2;IPI00797574.3
1663.76	LAFQNMnGSEYFVK;LLnTSYSHNEGPGMK	1		1.155	LAFQNmnGSEYFVK	IPI00025110.5;IPI00793522.1;IPI00793649.1;IPI00798210.1;IPI00184265.2;IPI00640455.1
1665.8	DnATEEEILVYLEK;nYSSICLPAIGTGNAK;VTGLnCTTNHPINPK	1		1.3422		IPI00012503.1;IPI00219825.2;IPI00744835.1;IPI00291215.6;IPI00783216.1;IPI00783683.2;IPI00783883.1;IPI00784370.1;IPI00306604.5
1665.82	nYSSICLPAIGTGNAK;AHIPnFTFNLGYSGK;VTGLnCTTNHPINPK	1		2.2449	VTGLncTTNHPINPK	IPI00291215.6;IPI00783216.1;IPI00783683.2;IPI00783883.1;IPI00784370.1;IPI00738468.1;IPI00784368.1;IPI00306604.5
1665.85	EIFVAnGTQGKLTCK;VVVVDGKnESEYTVK;TKCEnQSGFILQLK;nASLSVYPKTHTGYK	2		1.2634		IPI00022558.2;IPI00410607.4;IPI00760547.1;IPI00029606.1;IPI00288894.1;IPI00102820.4;IPI00428447.1;IPI00428450.1;IPI00472533.1;IPI00297388.7
1668.9	AFLYRLWKGnVSSK	2	1	0.10028		IPI00063048.6;IPI00479942.2
1669.86	QVTQEMLnHTIAIR		1	0.35661		IPI00940698.4
1689.76	GHSAAVHSFAFSnDSR		1	0.54606		IPI00000948.3
1693.79	ESLMnQSRWNSGLR;AnESRLEEADQLYR;FELSEnCSERPGLR		2	1.8336	AnESRLEEADQLYR	IPI00171117.5;IPI00470924.2;IPI00829865.1;IPI00219114.1;IPI00872359.2
1727.77	FLEFGPEnCTSWIK	1		1.2314		IPI00177437.5;IPI00219317.3;IPI00219318.3;IPI01011870.1
1757.8	ASVSFLNFnLSNCER		1	0.6318	ASVSFLNFnLSNcER	IPI00235622.1;IPI00290039.7;IPI00736241.3
1765.84	VYInDSVELSQNEQK;DTEASHLAPnHTTFPK	1		2.1699	VYInDSVELSQNEQK	IPI00002816.1;IPI00556241.3;IPI00639831.2
1769.77	SDSENILTNYEnQSR		1	0.65032		IPI00142768.6;IPI00642259.6;IPI00956289.3
1791.98	InNTHALVSLLQNLNK	1		0.77443		IPI01013272.1
1801.76	DDLDPEKnDSEPGSQR	1	1	0.12709	DDLDPEKnDSEPGSQR	IPI00953206.1;IPI00953262.1;IPI00953650.1;IPI00978064.1;IPI01015859.1
1805.77	MCFDMLNSLISnNSK	1		0.79665		IPI00102118.2;IPI00795813.1;IPI00796815.1
1806.92	RnITLAYTLEADRDR		3	8.5052		IPI00215995.1;IPI00290043.2
1819.92	IFSLLSGEGnVTFNGHK	1		0.50409		IPI00009471.1
1826.89	nESLQPSLQSPQTELR		1	2.7016		IPI00156791.6
1826.99	RQDVnITVATVPSWLK	1	1	0.90552		IPI00170814.1;IPI00174794.1;IPI00298292.4;IPI00478565.2
1852.84	GAnVSWEPGFDGGYLQR		1	1.0784		IPI00024053.3
1875.89	YPGIFnSTTSDAFLQSK	1		2.9913	YPGIFnSTTSDAFLQSK	IPI00294455.2
1887.93	TDQEAPnASQPTPPPLPK	1		0.58637		IPI00737545.4
1895.73	IYGPFCECDnFSCAR		1	3.632		IPI00029741.1
1942.07	AGALSnVSVSIQNLLLSQK	1		1.5316		IPI00060989.1;IPI00441068.1;IPI00873168.1
1946.9	ETTGTGPNVYHEnDTIAK	1		1.0555		IPI00059264.3
1952.82	CPAGTYVSEHCTnTSLR;RAQTTNSnSSSSSDVSTHS		1	1.6688		IPI00004413.1;IPI00396279.3;IPI00744551.2;IPI01024943.1
1954.93	LHNVFnLSFLNCGEYK	1		0.23998		IPI00410140.2
1955	RYLLQNTALEVFMAnR		2	1.2784		IPI00328195.6
1959.87	LTSAHQEnTSLSEEEER		1	0.277		IPI00305086.3;IPI00944940.1
1965.93	SQnDTVTPDVWYTSKPK	2		0.93387		IPI00012440.8
1975.05	GHPQILEAAGnASAGTVLLR		1	0.56851		IPI00289831.5;IPI00332271.7;IPI00332272.3;IPI00332273.3;IPI00743517.1
2047.02	DLLSGLYFDQRnYSSLR;nTSAASTAQLVEATEELRR;QHIQGYRRnFSLLnVSN		2	0.68612		IPI00007277.2;IPI00296922.4;IPI00454596.1
2057.01	MEAVQKInYTVPQSGTFK	2		2.4742		IPI00152540.3;IPI00788676.1;IPI00795327.3;IPI00795801.1
2077.95	QLVHSFAEGQDQGSAYAnR;LENCEnFTFVSFTQVSR		1	0.71121		IPI00019275.3;IPI00410488.2;IPI00441094.1;IPI00719044.1;IPI00329470.3
2082	KYQTLnCSVNVNCVNIR;YVRnVSCSVnNTLLGQEK;GSADCLPKLSYQnSSSIVR;APITHGNVKTNAnHSNNHR	1	1	1.9863		IPI00010697.2;IPI00216221.2;IPI00216222.2;IPI00216223.3;IPI00216224.2;IPI00216225.2;IPI00921080.1;IPI00921401.1;IPI00013576.2;IPI00550454.1;IPI00396063.6;IPI00737545.4
2093.98	IAKGECGnSSLMAEVENLR;VnATEEMLQQVCAEARTK	1	1	1.3603		IPI00297210.4;IPI00642180.1;IPI00745798.1;IPI00302158.2
2097.05	SQGYnSSQDLPSLVLDFVK	1		2.1681		IPI00018264.1;IPI00478294.3
2101	SAEGTFFInKTEIEDFPR;ISAMDASPRnISPGLQNGEK	1	1	1.3828		IPI00027851.2;IPI00396145.2
2109.9	EPGSnVTMSVDAECVPMVR;SCDnISDTGIMHLAMGSLR;MnLTEGPLAMAEMDPTQGR		1	0.4454		IPI00023673.1;IPI00166145.3;IPI00396374.9
2169.95	NGMLPASYGPGEQnGTGGYQR		1	2.5001		IPI00419933.3;IPI00976962.1
2175.05	LTnVTFPTGVVTNLHGDMDK	1		3.589		IPI00398020.7
2186.01	DKnGTRAEPPLnASASDQGEK	2	1	1.2244		IPI00000877.1
2186.93	HPGnFSSLSCDYFAVnQSR		1	1.5161		IPI00306604.5
2206.99	SLLEFnTTVSCDQQGTNHR;SNNGLAIHIFLCnTSMENR		1	2.0593		IPI00289819.5;IPI00303174.2
2210.12	FLTEVEKnATALYHVEAFK	2		1.4678		IPI00028553.1;IPI00293748.3;IPI00607763.1
2210.13	FLTEVEKnATALYHVEAFK;AFEELFGICIQLLnKTWK	2		0.9058		IPI00028553.1;IPI00293748.3;IPI00607763.1;IPI00940537.1
2255.01	VTTYCnETMTGWVHDVLGR		1	1.6297		IPI00022810.2
2264.95	VNTEDHQGEYVCEALnDSGK	1		9.3108		IPI00023283.3;IPI00375498.3;IPI00759542.1;IPI00759613.4;IPI00759754.1
2270.07	GHLDEEEVIASGVEnASGISEK	1		0.1688		IPI00853158.2;IPI00888914.4;IPI00966736.1;IPI00967031.1
2285.13	ERPPTFLTPEGnASNKEELR	1	2	0.4541		IPI00333776.6;IPI00333777.6;IPI00333778.6;IPI00415032.2;IPI00873446.2
2295.08	VAPQnDSFGTQLPPMHQQQR		1	3.4426		IPI00853059.2
2301.01	NFHSMQNLCPPQTnGTPEGR		1	0.55408		IPI00028588.1;IPI00332777.4
2305.02	GEPSNEPSTETnKTQEQSDVK;LSTTECVDAGGESHAnNTKWK	2		1.9455		IPI00008085.5;IPI00016112.6
2315.05	VFPYISAMVNnGSLSYDHER		1	0.6711		IPI00218337.3;IPI00744259.1
2389.05	KLGDCISEDSYPDGnITWYR;ETKLNGPGEnVSEDEAQSSNQR	1	1	3.9203		IPI00015102.2;IPI00807403.1;IPI00383949.2;IPI00855953.1;IPI00856120.1;IPI00940348.1
2437.24	LHLMnFTATYTRHPPLLPNGK;YNQRISLAIPNLGnTSQQEYK	1	1	1.0903		IPI00008255.3;IPI00299517.3
2466.24	QnITILIPETHKTATGSSDNPTK	2		0.84281		IPI00925578.1
2468.14	SCSPVYLGGSSIPCGIGTnISWR		1	4.9848		IPI00043741.4
2469.12	FVEQnETAInITTYPDQENNK;DTTLFDLSQFGSSnTSHENLQK	1		2.4206		IPI00029723.1;IPI00329605.6
2474.18	LPSVPTVDSVSQDPVSnMSITER;NALnLTFHAQNVGEGGAYEAELR		1	0.95507		IPI00002255.5;IPI00945818.2;IPI00306604.5
2504.07	MEENnDSTENPQQGQGRQNAIK;NACCSTnTSQEAHKDVSYLYR	1	1	0.066184		IPI00166301.6;IPI00829821.1;IPI00441498.1
2570.24	MNKLYIGnLSENAAPSDLESIFK	2		0.80648		IPI00658000.3
2648	EQQLESCACnETDNSCKVCCR	1	1	4.1842		IPI00029606.1;IPI00288894.1
2784.27	TGPVVEDSGSLLLEYVnGSACTTSDGR		1	1.813		IPI00289819.5
2904.34	ELPPFWEQRNDLYYNTITnFSEK	1	1	0.71685		IPI00339381.3;IPI00759790.1
2913.44	EQKYEDGIALLRNALAnQSDCVLHR	1	2	0.62751		IPI00008248.4;IPI00915282.1
3013.35	ENDENCGPTTTVFVGnISEKASDMLIR	1	1	1.3334		IPI00004273.6;IPI00924634.1;IPI00925670.2;IPI00926163.1
3013.49	VQnTSLEAIVQnASSDNQGIQLSAVQAAR		1	0.3582		IPI00012578.1
3098.49	DSPVLPVTLQCnLTSSSHTLTYSYWTK	1		0.62105		IPI00011578.1;IPI00018311.1;IPI00654584.7;IPI00657724.1;IPI00964352.1
3185.4	TTDEMTTEFFQnISSEHQTQLYEVYK	1		0.64777		IPI00099831.1;IPI00554485.1
3270.62	NALLLLADDGGFESGAYnNSAIATPHLDALAR		1	1.1325		IPI00019988.1
3360.57	LYYRDASACVIMFDVTnATTFSNSQRWK;EPKHPLGGREACGMDTLPLNGNFnNSYSLR	1	2	0.56556		IPI00024775.1;IPI00183445.1;IPI00410210.1
3516.63	SNLDPSNVDSLFYAAQASQALSGCEISISnETK	1		0.94118		IPI00028635.5
3752.7	LGNTISSLFGGGTTPDAKEnGTDTVQEEEESPAEGSK;TPLHYFDSQCMAAMNFQTMHnVTTETKFLLK	2		0.50916		IPI00000877.1;IPI00746651.6;IPI00761101.2;IPI00793901.2
3807.85	EMAQYASnITSVLCQFPSQQIANILDSHAATLNR;GHEVEDVDLELFnTSVQLQPPTTAPGPETAAFIER		1	0.71469		IPI00011569.2;IPI00396015.5;IPI00396018.1;IPI00847501.1;IPI00384722.2;IPI00419642.4;IPI00880178.1
3844.8	VIFQEnVSDENSWKSEAEIDMELFHQNHLIVK	2		1.0695		IPI00217710.2;IPI00218771.1;IPI00218772.1
4127.96	TLTnQTEAELATPEGIYERPVDYLPERDVYESLCR		3	1.0873		IPI00003128.1;IPI00182373.2
4150.79	GHDLNEDGLVSWEEYKnATYGYVLDDPDPDDGFNYK	2		0.6268		IPI00941900.1
aThe mass (M) of the light peptides detected in SILAC peak pairs.
bThe detected mass of light peak were matched to identified N-glycopeptides from SKOV-3 and OVCAR-3 cell lines with 10ppm mass errors. 'n' represents potential N-linked glycosylation site.
cThe normalized H/L ratios obtained by MaxQuant.
dThe peptides identified by MS/MS fragmentation spectra from the same raw data (Using Sequest searching against human IPI3.87 database with 10 ppm and 1% FDR).
